# Supplementary material
Source: publisher site journal article supplement (https://www.dovepress.com/article/337323)
Supplement: Supplementary file 1 [file get_supplementary_file.php]

**Trends in the annual consultation incidence and prevalence of low back pain and osteoarthritis in England: comparative estimates from the Clinical Practice Research Datalink GOLD and AURUM databases**

**SUPPLEMENTAL FILE**

*Table S1. Published UK estimates of low back pain incidence and prevalence estimates from EHR/administrative data.....* 3

*Table S2. Published UK estimates of osteoarthritis incidence and prevalence estimates from EHR/administrative data.....* 5

*Table S3. List of published international estimates of low back pain incidence and prevalence estimates from EHR/administrative data.....* 9

*Table S4. List of published international estimates of osteoarthritis incidence and prevalence estimates from EHR/administrative data.....* 10

*Table S5. Comparative estimates from CPRD Aurum and CPRD GOLD databases of annual consultation incidence of low back pain: England, 2000-2019.....* 12

*Table S6. Comparative estimates from CPRD Aurum and CPRD GOLD databases of annual consultation prevalence of low back pain: England, 2000-2019.....* 13

*Table S7. Comparative estimates from CPRD Aurum and CPRD GOLD databases of annual consultation incidence of osteoarthritis: England, 2000-2019.....* 14

*Table S8. Comparative estimates from CPRD Aurum and CPRD GOLD databases of annual consultation prevalence of osteoarthritis: England, 2000-2019.....* 15

*Table S9. Annual person-consulting prevalence of low back pain (without requirement for 3-year prior registration history): England, 2000-2019 .....* 17

*Table S10. Annual consultation prevalence of osteoarthritis (without requirement for 3-year prior registration history): England, 2000-2019 .....* 18

*Figure S1. Illustrative workflow chart for estimating annual person-consulting incidence of low back pain: West Midlands, 2017.....* 19

*Figure S2. Illustrative workflow chart for estimating annual person-consulting prevalence of low back pain: West Midlands, 2017.....* 21

*Figure S3. Annual consultation incidence of low back pain, by age and sex: England, 2000-2019 .....* 23

*Figure S4. Annual consultation prevalence of low back pain, by age and sex: England, 2000-2019 .....* 24

*Figure S5. Annual consultation incidence of low back pain, by region: England, 2000-2019 .....* 25

*Figure S6. Annual consultation prevalence of low back pain, by region: England, 2000-2019 .....* 26

*Figure S7. Age-stratified primary care annual person-consulting incidence of diagnosed osteoarthritis, by sex: England, 2000-2019.....* 27

*Figure S8. Age-stratified primary care annual person-consulting prevalence of diagnosed osteoarthritis, by sex: England, 2000-2019.....* 28

*Figure S9. Annual consultation incidence of osteoarthritis, by region: England, 2000-2019 .....* 29

*Figure S10. Annual consultation prevalence of osteoarthritis, by region: England, 2000-2019 .....* 30

*Figure S11. Annual consultation prevalence of low back pain, by sex (without requirement for 3-year prior registration history): England, 2000-2019 .....* 31

*Figure S12. Age-stratified annual consultation prevalence of low back pain, by sex (without requirement for 3-year prior registration history): England, 2000-2019 .....* 32

|                                                                                                                                                                     |           |
|---------------------------------------------------------------------------------------------------------------------------------------------------------------------|-----------|
| <i>Figure S13. Annual consultation prevalence of low back pain, by region (without requirement for 3-year prior registration history): England, 2000-2019.....</i>  | <i>33</i> |
| <i>Figure S14. Annual consultation prevalence of osteoarthritis, by sex (without requirement for 3-year prior registration history): England, 2000-2019.....</i>    | <i>34</i> |
| <i>Figure S16. Annual consultation prevalence of osteoarthritis, by region (without requirement for 3-year prior registration history): England, 2000-2019.....</i> | <i>36</i> |
| <i>Figure S17. Joinpoint regression models for standardised incidence and prevalence of low back pain and osteoarthritis in CPRD Aurum and GOLD.....</i>            | <i>37</i> |

**Table S1. Published UK estimates of low back pain incidence and prevalence estimates from EHR/administrative data**

| Database                             | Year      | Case definition                                                                                                                                                                  | Parameter                                                            | Estimate                                                                                                                                  |
|--------------------------------------|-----------|----------------------------------------------------------------------------------------------------------------------------------------------------------------------------------|----------------------------------------------------------------------|-------------------------------------------------------------------------------------------------------------------------------------------|
| <b>(a) Prevalence</b>                |           |                                                                                                                                                                                  |                                                                      |                                                                                                                                           |
| <b>RCGP WRS [1]</b>                  | 2001      | One or more (Read codes mapped to ICD9 724 “Back disorders unspecified other”) consultation in 12-month period                                                                   | Age-standardised annual person-consulting prevalence rate            | 40.5 per 1,000 persons (all ages)                                                                                                         |
|                                      | 2001      | One or more (Read codes mapped to ICD9 721 “Spondylosis and allied disorders”) consultation in 12-month period                                                                   | Age-standardised annual person-consulting prevalence rate            | 5.8 per 1,000 persons (all ages)                                                                                                          |
|                                      | 2001      | One or more (Read codes mapped to ICD9 722 “Intervertebral disk disorder”) consultation in 12-month period                                                                       | Age-standardised annual person-consulting prevalence rate            | 2.2 per 1,000 persons (all ages)                                                                                                          |
| <b>CiPCA [2]</b>                     | 2000-2004 | One or more (? Read codes “Back disorders unspecified”) consultation in 12-month period                                                                                          | Age-standardised annual person-consulting prevalence rate            | 2000: 29.2 per 1,000 persons aged 65+ years<br>2003: 35.3 per 1,000 persons aged 65+ years<br>2004: 40.1 per 1,000 persons aged 65+ years |
| <b>CiPCA [3]</b>                     | 2006      | One or more (Read codes selected from chapters N, R, S, 1 “lower back”) consultation in 12-month period                                                                          | Age-standardised annual person-consulting prevalence rate            | 41.7 per 1,000 persons (all ages)                                                                                                         |
| <b>CiPCA [4]</b>                     | 2010      | One or more (ICD10 codes mapped to Read codes “low back pain”) consultation in 12-month period                                                                                   | Crude annual person-consulting prevalence rate                       | 58.7 per 1,000 persons (all ages)†<br>54.3 per 1,000 persons (all ages)‡                                                                  |
|                                      |           |                                                                                                                                                                                  | Crude 7-year period person-consulting prevalence rate                | 211.3 per 1,000 persons (all ages) †<br>205.3 per 1,000 persons (all ages) ‡                                                              |
| <b>CALIBER (CPRD GOLD + HES) [5]</b> | 2010-2015 | One or more (selected Read codes from chapters 7, N, and Z) primary care consultations or finished consultant episodes (ICD10 M50-51) mapped to “intervertebral disk disorder”)¶ | Age-sex standardized 5-year period person-consulting prevalence rate | 31.5 per 1,000 persons (all ages)                                                                                                         |

CiPCA Consultations in Primary Care Archive; CPRD Clinical Practice Research Datalink; HES Hospital Episode Statistics; RCGP WRS Royal College of General Practitioners Weekly Returns Service

† Based on primary care and secondary data available through primary care EHR

‡ Based on primary care data only

- [1] Fleming DM, Cross KW, Barley MA. Recent changes in the prevalence of diseases presenting for health care. *Br J Gen Pract.* 2005 Aug;55(517):589-95.
- [2] Hughes H, Jordan KP, Rajaratnam G, Fawcett S, Croft P. Recent changes in general practice morbidity in older people. *Age Ageing.* 2008;37:572-575. PMID: [18487261](#)
- [3] Jordan KP, Kadam UT, Hayward R, Porcheret M, Young C, Croft P. Annual consultation prevalence of regional musculoskeletal problems in primary care: an observational study. *BMC Musculoskelet Disord.* 2010 Jul 2;11:144. doi: 10.1186/1471-2474-11-144.
- [4] Jordan KP, Jöud A, Bergknut C, Croft P, Edwards JJ, Peat G, Petersson IF, Turkiewicz A, Wilkie R, Englund M. International comparisons of the prevalence of health care for musculoskeletal disorders using population-based health care data from England and Sweden, *Annals of the Rheumatic Diseases*, 2014;73:1:212-218
- [5] Kuan V, Denaxas S, Gonzalez-Izquierdo A, Direk K, Bhatti O, Husain S, et al. A chronological map of 308 physical and mental health conditions from 4 million individuals in the English National Health Service. *The Lancet Digital Health.* 2019 /06/01;1(2):e63-77.

**Table S2. Published UK estimates of osteoarthritis incidence and prevalence estimates from EHR/administrative data**

| Database                      | Year      | Case definition                                                                                                                                | Parameter                                                            | Estimate                                                                                                                                                                                                                                          |
|-------------------------------|-----------|------------------------------------------------------------------------------------------------------------------------------------------------|----------------------------------------------------------------------|---------------------------------------------------------------------------------------------------------------------------------------------------------------------------------------------------------------------------------------------------|
| <b>(a) Prevalence</b>         |           |                                                                                                                                                |                                                                      |                                                                                                                                                                                                                                                   |
| RCGP WRS [1]                  | 2001      | One or more (Read codes mapped to ICD9 715) consultation in 12-month period                                                                    | Age-standardised annual person-consulting prevalence rate            | 22.4 per 1,000 persons (all ages)                                                                                                                                                                                                                 |
| MSGP4 [2]                     | 1991-1992 | One or more (Read N05) consultation in 12-month period                                                                                         | Age-sex standardized annual person-consulting prevalence rate        | 42.6 per 1,000 persons (aged 15+ years)                                                                                                                                                                                                           |
| RCGP WRS [2]                  | 2001      | One or more (Read N05) consultation in 12-month period                                                                                         | Age-sex standardized annual person-consulting prevalence rate        | 27.6 per 1,000 persons (aged 15+ years)                                                                                                                                                                                                           |
| GPRD [2]                      | 1991      | One or more (Read N05) consultation in 12-month period                                                                                         | Age-sex standardized annual person-consulting prevalence rate        | 3.8 per 1,000 persons (aged 15+ years)                                                                                                                                                                                                            |
| GPRD [2]                      | 2001      | One or more (Read N05) consultation in 12-month period                                                                                         | Age-sex standardized annual person-consulting prevalence rate        | 16.4 per 1,000 persons (aged 15+ years)                                                                                                                                                                                                           |
| CiPCA [2]                     | 2001      | One or more (Read N05) consultation in 12-month period                                                                                         | Age-sex standardized annual person-consulting prevalence rate        | 23.2 per 1,000 persons (aged 15+ years)                                                                                                                                                                                                           |
| CiPCA [3]                     | 2000-2004 | One or more (Read N05) consultation in 12-month period                                                                                         | Age-standardised annual person-consulting prevalence rate            | 2000: 65.9 per 1,000 persons (aged 65+ years)<br>2003: 70.2 per 1,000 persons (aged 65+ years)<br>2004: 64.9 per 1,000 persons (aged 65+ years)                                                                                                   |
| CiPCA [4]                     | 2010      | One or more (Read N05) consultation in 12-month period                                                                                         | Crude annual person-consulting prevalence rate                       | 21.1 per 1,000 persons (all ages) <sup>†</sup><br>17.6 per 1,000 persons (all ages) <sup>‡</sup><br>44.7 per 1,000 persons (aged 45+ years) <sup>†</sup><br>37.5 per 1,000 persons (aged 45+ years) <sup>‡</sup>                                  |
|                               |           |                                                                                                                                                | Age-sex standardized 7-year period person-consulting prevalence rate | 65.1 per 1,000 persons (all ages) <sup>†</sup><br>58.6 per 1,000 persons (all ages) <sup>‡</sup><br>138.8 per 1,000 persons aged 45+ years <sup>†</sup><br>125.4 per 1,000 persons aged 45+ years <sup>‡</sup>                                    |
| CALIBER (CPRD GOLD + HES) [5] | 2010-2015 | One or more (Read code N05, and 14 selected Nyu and 3 symptom codes) primary care consultations or finished consultant episodes (ICD10 M15-19) | Age-sex standardized 5-year period person-consulting prevalence rate | 127.2 per 1,000 persons (all ages)                                                                                                                                                                                                                |
| CPRD GOLD [6]                 | 1997-2017 | One or more (Read N05) consultation in 12-month period                                                                                         | Age-sex-LOD standardized prevalence rate (ever)                      | 1998: 82.3 per 1,000 persons (aged 20+ years)<br>1999: 84.7 per 1,000 persons (aged 20+ years)<br>2000: 89.4 per 1,000 persons (aged 20+ years)<br>2001: 90.8 per 1,000 persons (aged 20+ years)<br>2002: 92.7 per 1,000 persons (aged 20+ years) |

|                      |           |                                                                         |                                                                 |                                                                                                                                                                                                                                                                                                                                                                                                                                                                                                                                                                                                                                                                                                                                                                                                                                                                      |
|----------------------|-----------|-------------------------------------------------------------------------|-----------------------------------------------------------------|----------------------------------------------------------------------------------------------------------------------------------------------------------------------------------------------------------------------------------------------------------------------------------------------------------------------------------------------------------------------------------------------------------------------------------------------------------------------------------------------------------------------------------------------------------------------------------------------------------------------------------------------------------------------------------------------------------------------------------------------------------------------------------------------------------------------------------------------------------------------|
|                      |           |                                                                         |                                                                 | 2003: 94.7 per 1,000 persons (aged 20+ years)<br>2004: 97.7 per 1,000 persons (aged 20+ years)<br>2005: 102.1 per 1,000 persons (aged 20+ years)<br>2006: 106.2 per 1,000 persons (aged 20+ years)<br>2007: 106.4 per 1,000 persons (aged 20+ years)<br>2008: 109.1 per 1,000 persons (aged 20+ years)<br>2009: 109.1 per 1,000 persons (aged 20+ years)<br>2010: 109.3 per 1,000 persons (aged 20+ years)<br>2011: 109.4 per 1,000 persons (aged 20+ years)<br>2012: 108.7 per 1,000 persons (aged 20+ years)<br>2013: 109.0 per 1,000 persons (aged 20+ years)<br>2014: 109.5 per 1,000 persons (aged 20+ years)<br>2015: 109.3 per 1,000 persons (aged 20+ years)<br>2016: 109.5 per 1,000 persons (aged 20+ years)<br>2017: 107.7 per 1,000 persons (aged 20+ years)                                                                                             |
| <b>(b) Incidence</b> |           |                                                                         |                                                                 |                                                                                                                                                                                                                                                                                                                                                                                                                                                                                                                                                                                                                                                                                                                                                                                                                                                                      |
| CiPCA [7]            | 2010      | One or more (Read N05) consultation in 12-month period (10-year run-in) | Crude annual person-consulting incidence rate                   | 7.2 per 1,000 persons (all ages)<br>8.6 per 1,000 persons (aged 15+ years)<br>16.1 per 1,000 persons (aged 45+ years)                                                                                                                                                                                                                                                                                                                                                                                                                                                                                                                                                                                                                                                                                                                                                |
| CPRD GOLD [8]        | 1992-2013 | One or more (Read N05) consultation in 12-month period (3-year run-in)  | Age-sex standardised annual person-consulting incidence density | 1992: 8.1 per 1,000 persons (all ages)<br>1993: 7.7 per 1,000 persons (all ages)<br>1994: 7.0 per 1,000 persons (all ages)<br>1995: 7.2 per 1,000 persons (all ages)<br>1996: 7.7 per 1,000 persons (all ages)<br>1997: 8.1 per 1,000 persons (all ages)<br>1998: 8.1 per 1,000 persons (all ages)<br>1999: 8.2 per 1,000 persons (all ages)<br>2000: 7.9 per 1,000 persons (all ages)<br>2001: 8.0 per 1,000 persons (all ages)<br>2002: 7.9 per 1,000 persons (all ages)<br>2003: 8.3 per 1,000 persons (all ages)<br>2004: 8.6 per 1,000 persons (all ages)<br>2005: 8.5 per 1,000 persons (all ages)<br>2006: 7.8 per 1,000 persons (all ages)<br>2007: 7.6 per 1,000 persons (all ages)<br>2008: 7.8 per 1,000 persons (all ages)<br>2009: 7.6 per 1,000 persons (all ages)<br>2010: 7.1 per 1,000 persons (all ages)<br>2011: 7.0 per 1,000 persons (all ages) |

|                                                                                                                                                                                                                                                                                                                                                                                                                                                           |           |                                                                                             |                                                                        |                                                                                                                                                                                                                                                                                                                                                                                                                                                                                                                                                                                                                                                                                                                                                                                                                                                                                                                                                                                                 |
|-----------------------------------------------------------------------------------------------------------------------------------------------------------------------------------------------------------------------------------------------------------------------------------------------------------------------------------------------------------------------------------------------------------------------------------------------------------|-----------|---------------------------------------------------------------------------------------------|------------------------------------------------------------------------|-------------------------------------------------------------------------------------------------------------------------------------------------------------------------------------------------------------------------------------------------------------------------------------------------------------------------------------------------------------------------------------------------------------------------------------------------------------------------------------------------------------------------------------------------------------------------------------------------------------------------------------------------------------------------------------------------------------------------------------------------------------------------------------------------------------------------------------------------------------------------------------------------------------------------------------------------------------------------------------------------|
|                                                                                                                                                                                                                                                                                                                                                                                                                                                           |           |                                                                                             |                                                                        | 2012: 6.7 per 1,000 persons (all ages)<br>2013: 6.3 per 1,000 persons (all ages)                                                                                                                                                                                                                                                                                                                                                                                                                                                                                                                                                                                                                                                                                                                                                                                                                                                                                                                |
| CPRD GOLD<br>[6]                                                                                                                                                                                                                                                                                                                                                                                                                                          | 1997-2017 | One or more (Read N05)<br>consultation in 12-month period<br>(variable whole-record run-in) | Age-sex-LOD standardized annual<br>person-consulting incidence density | 1998: 9.5 per 1,000 persons (aged 20+ years)<br>1999: 9.7 per 1,000 persons (aged 20+ years)<br>2000: 9.6 per 1,000 persons (aged 20+ years)<br>2001: 9.4 per 1,000 persons (aged 20+ years)<br>2002: 9.6 per 1,000 persons (aged 20+ years)<br>2003: 10.0 per 1,000 persons (aged 20+ years)<br>2004: 10.4 per 1,000 persons (aged 20+ years)<br>2005: 10.3 per 1,000 persons (aged 20+ years)<br>2006: 9.6 per 1,000 persons (aged 20+ years)<br>2007: 9.5 per 1,000 persons (aged 20+ years)<br>2008: 9.6 per 1,000 persons (aged 20+ years)<br>2009: 9.4 per 1,000 persons (aged 20+ years)<br>2010: 8.7 per 1,000 persons (aged 20+ years)<br>2011: 8.5 per 1,000 persons (aged 20+ years)<br>2012: 8.1 per 1,000 persons (aged 20+ years)<br>2013: 7.9 per 1,000 persons (aged 20+ years)<br>2014: 7.8 per 1,000 persons (aged 20+ years)<br>2015: 7.5 per 1,000 persons (aged 20+ years)<br>2016: 7.2 per 1,000 persons (aged 20+ years)<br>2017: 6.8 per 1,000 persons (aged 20+ years) |
| <p>CiPCA Consultations in Primary Care Archive; CPRD Clinical Practice Research Datalink; GPRD General Practice Research Database; HES Hospital Episode Statistics; LOD Length of data contribution; MSGP Morbidity Survey in General Practice; RCGP WRS Royal College of General Practitioners Weekly Returns Service;</p> <p>† Based on primary care and secondary data available through primary care EHR</p> <p>‡ Based on primary care data only</p> |           |                                                                                             |                                                                        |                                                                                                                                                                                                                                                                                                                                                                                                                                                                                                                                                                                                                                                                                                                                                                                                                                                                                                                                                                                                 |

[1] Fleming DM, Cross KW, Barley MA. Recent changes in the prevalence of diseases presenting for health care. *Br J Gen Pract.* 2005 Aug;55(517):589-95.

[2] Jordan K, Clarke AM, Symmons DP. et al. Measuring disease prevalence: a comparison of musculoskeletal disease using four general practice consultation databases. *Br J Gen Pract* 2007;57:7–14. [[PMC free article](#)] [[PubMed](#)] [[Google Scholar](#)]

[3] Hughes H, Jordan KP, Rajaratnam G, Fawcett S, Croft P. Recent changes in general practice morbidity in older people. *Age Ageing.* 2008;37:572-575. **PMID:** [18487261](#)

[4] Jordan KP, Jöud A, Bergknut C. et al. International comparisons of the consultation prevalence of musculoskeletal conditions using population-based healthcare data from England and Sweden. *Ann Rheum Dis* 2014;73:212–8. [[PMC free article](#)] [[PubMed](#)] [[Google Scholar](#)]

[5] Kuan V, Denaxas S, Gonzalez-Izquierdo A, Direk K, Bhatti O, Husain S, et al. A chronological map of 308 physical and mental health conditions from 4 million

individuals in the English National Health Service. *The Lancet Digital Health*. 2019 /06/01;1(2):e63-77.

[6] Swain S, Sarmanova A, Mallen C, Kuo CF, Coupland C, Doherty M, Zhang W. Trends in incidence and prevalence of osteoarthritis in the United Kingdom: findings from the Clinical Practice Research Datalink (CPRD). *Osteoarthritis Cartilage*. 2020 Jun;28(6):792-801. doi: 10.1016/j.joca.2020.03.004.

[7] Yu D, Peat G, Bedson J, Jordan KP.. Annual consultation incidence of osteoarthritis estimated from population-based health care data in England. *Rheumatology* 2015;54:2051–60. [[PMC free article](#)] [[PubMed](#)] [[Google Scholar](#)]

[8] Yu D, Jordan KP, Bedson J, Englund M, Blyth F, Turkiewicz A, Prieto-Alhambra D, Peat G. Population trends in the incidence and initial management of osteoarthritis: age-period-cohort analysis of the Clinical Practice Research Datalink, 1992-2013. *Rheumatology (Oxford)*. 2017 Nov 1;56(11):1902-1917. doi: 10.1093/rheumatology/kex270.



**Table S3. List of published international estimates of low back pain incidence and prevalence estimates from EHR/administrative data**

|                                                                                                                                                                                                                                                                        |
|------------------------------------------------------------------------------------------------------------------------------------------------------------------------------------------------------------------------------------------------------------------------|
| Beaudet N, Courteau J, Sarret P, Vanasse A. Prevalence of claims-based recurrent low back pain in a Canadian population: a secondary analysis of an administrative database. <i>BMC Musculoskeletal Disorder</i> 2013; 14(1):15                                        |
| Fatoye F, Gebrye T, Odeyemi I. Real-world incidence and prevalence of low back pain using routinely collected data. <i>Rheumatol Int</i> 2019;39:619-626.                                                                                                              |
| Jöud A, Petersson IF, Englund M (2012) Low back pain: epidemiology of consultations. <i>Arthritis Care Res</i> ; 2012; 64(7):1084–1088                                                                                                                                 |
| Bartholomeeusen S, Van Zundert J, Truyers C, Buntinx F, Paulus D. Higher incidence of common diagnoses in patients with low back pain in primary care. <i>Pain Pract</i> ; 2012; 12(1):1–6                                                                             |
| Kostev K. Real-world prevalence and incidence of lower back pain in Germany. <i>Rheumatol Int</i> . 2019 Jun;39(6):1113. doi: 10.1007/s00296-019-04295-8.                                                                                                              |
| Spijker-Huiges A, Groenhof F, Winters JC, van Wijhe M, Groenier KH, van der Meer K (2015) Radiating low back pain in general practice: incidence, prevalence, diagnosis, and long-term clinical course of illness. <i>Scand J Prim Health Care</i> ; 2015; 33(1):27–32 |

**Table S4. List of published international estimates of osteoarthritis incidence and prevalence estimates from EHR/administrative data**

|                                                                                                                                                                                                                                                                                                                                                    |
|----------------------------------------------------------------------------------------------------------------------------------------------------------------------------------------------------------------------------------------------------------------------------------------------------------------------------------------------------|
| Harrold LR, Yood RA, Andrade SE, Reed JI, Cernieux J, Straus W, Weeks M, Lewis B, Gurwitz JH. Evaluating the predictive value of osteoarthritis diagnoses in an administrative database. <i>Arthritis Rheum.</i> 2000;43(8):1881-5. <b>PMID:</b> <a href="#">10943880</a>                                                                          |
| Kopec JA, Rahman MM, Berthelot JM. et al. Descriptive epidemiology of osteoarthritis in British Columbia, Canada. <i>J Rheumatol</i> 2007;34:386–93. [ <a href="#">PubMed</a> ] [ <a href="#">Google Scholar</a> ]                                                                                                                                 |
| Kopec JA, Rahman MM, Sayre EC. et al. Trends in physician-diagnosed osteoarthritis incidence in an administrative database in British Columbia, Canada, 1996-1997 through 2003-2004. <i>Arthritis Rheum</i> 2008;59:929–34. [ <a href="#">PubMed</a> ] [ <a href="#">Google Scholar</a> ]                                                          |
| Ladouceur M, Rahme E, Pineau CA, Joseph L. Robustness of prevalence estimates derived from misclassified data from administrative databases. <i>Biometrics.</i> 2007;63(1):272-9. <b>PMID:</b> <a href="#">17447953</a>                                                                                                                            |
| Marshall DA, Vanderby S, Barnabe C. et al. Estimating the burden of osteoarthritis to plan for the future. <i>Arthritis Care Res</i> 2015;67:1379–86. [ <a href="#">PubMed</a> ] [ <a href="#">Google Scholar</a> ]                                                                                                                                |
| Nielen MM, van Sijl AM, Peters MJ, Verheij RA, Schellevis FG, Nurmohamed MT. Cardiovascular disease prevalence in patients with inflammatory arthritis, diabetes mellitus and osteoarthritis: a cross-sectional study in primary care. <i>BMC Musculoskelet Disord.</i> 2012;13:150. <b>PMID:</b> <a href="#">22906083</a>                         |
| Postler A, Ramos AL, Goronzy J, Günther K-P <sup>1</sup> , Lange T <sup>2</sup> , Schmitt J, Zink A, Hoffmann F. Prevalence and treatment of hip and knee osteoarthritis in people aged 60 years or older in Germany: an analysis based on health insurance claims data. <i>Clin Interv Aging</i> 2018;13:2339-2349.                               |
| Prieto-Alhambra D, Judge A, Javaid MK. et al. Incidence and risk factors for clinically diagnosed knee, hip and hand osteoarthritis: influences of age, gender and osteoarthritis affecting other joints. <i>Ann Rheum Dis</i> 2014;73:1659–64. [ <a href="#">PMC free article</a> ] [ <a href="#">PubMed</a> ] [ <a href="#">Google Scholar</a> ] |
| Puts MT, Deeg DJ, Hoeymans N, Nusselder WJ, Schellevis FG. Changes in the prevalence of chronic disease and the association with disability in the older Dutch population between 1987 and 2001. <i>Age Ageing.</i> 2008 Mar;37(2):187-93. doi: 10.1093/ageing/afm185                                                                              |
| Rahman MM, Cibere J, Goldsmith CH, Anis AH, Kopec JA.. Osteoarthritis incidence and trends in administrative health records from British Columbia, Canada. <i>J Rheumatol</i> 2014;41:1147–54. [ <a href="#">PubMed</a> ] [ <a href="#">Google Scholar</a> ]                                                                                       |
| Sacks JJ, Luo YH, Helmick CG. Prevalence of specific types of arthritis and other rheumatic conditions in the ambulatory health care system in the United States, 2001-2005. <i>Arthritis Care Res (Hoboken).</i> 2010;62(4):460-4. <b>PMID:</b> <a href="#">20391499</a>                                                                          |
| Schers H, Bor H, van den Hoogen H, van Weel C.. What went and what came? Morbidity trends in general practice from the Netherlands. <i>Eur J Gen Pract</i> 2008;14:13–24. [ <a href="#">PubMed</a> ] [ <a href="#">Google Scholar</a> ]                                                                                                            |
| Sun J, Gooch K, Svenson LW, Bell NR, Frank C.. Estimating osteoarthritis incidence from population-based administrative health care databases. <i>Ann Epidemiol</i> 2007;17:51–6. [ <a href="#">PubMed</a> ] [ <a href="#">Google Scholar</a> ]                                                                                                    |
| Turkiewicz A, Petersson IF, Björk J. et al. Current and future impact of osteoarthritis on health care: a population-based study with projections to year 2032. <i>Osteoarthritis Cartilage</i> 2014;22:1826–32. [ <a href="#">PubMed</a> ] [ <a href="#">Google Scholar</a> ]                                                                     |

van den Dungen C, Hoeymans N, Boshuizen HC. et al. The influence of population characteristics on variation in general practice based morbidity estimations. *BMC Public Health* 2011;11:887.. [[PMC free article](#)] [[PubMed](#)] [[Google Scholar](#)]

van der Waal JM, Bot SD, Terwee CB. et al. The incidences of and consultation rate for lower extremity complaints in general practice. *Ann Rheum Dis* 2006;65:809–15. [[PMC free article](#)] [[PubMed](#)] [[Google Scholar](#)]

van den Dungen C, Hoeymans N, Boshuizen HC, van den Akker M, Biermans MC, van Boven K, Brouwer HJ, Verheij RA, de Waal MW, Schellevis FG, Westert GP. The influence of population characteristics on variation in general practice based morbidity estimations. *BMC Public Health*. 2011;11:887. **PMID:** [22111707](#)

Westert GP, Schellevis FG, de Bakker DH, Groenewegen PP, Bensing JM, van der Zee J. Monitoring health inequalities through general practice: the Second Dutch National Survey of General Practice. *Eur J Public Health*. 2005;15(1):59-65. **PMID:** [15788805](#)

**Table S5. Comparative estimates from CPRD Aurum and CPRD GOLD databases of annual consultation incidence of low back pain: England, 2000-2019**

*Standard population = mid-2019 English population aged 15+ years (ONS code: E92000001)*

| Year | CPRD Aurum     |              |                            |                                            | CPRD GOLD      |              |                            |                                            |
|------|----------------|--------------|----------------------------|--------------------------------------------|----------------|--------------|----------------------------|--------------------------------------------|
|      | Incident Cases | Person-years | Crude incidence IR (95%CI) | Age-sex-standardised incidence IR (95% CI) | Incident Cases | Person-years | Crude incidence IR (95%CI) | Age-sex-standardised incidence IR (95% CI) |
| 2000 | 96,971         | 4,897,353    | 19.80 (19.68 to 19.93)     | 19.53 (19.49 to 19.58)                     | 34,728         | 91,0720      | 38.13 (37.73 to 38.53)     | 37.69 (37.63 to 37.75)                     |
| 2001 | 113,150        | 4,992,711    | 22.66 (22.53 to 22.80)     | 22.36 (22.32 to 22.41)                     | 41,522         | 1,038,826    | 39.97 (39.59 to 40.35)     | 39.46 (39.41 to 39.52)                     |
| 2002 | 130,969        | 5,104,210    | 25.66 (25.52 to 25.80)     | 25.34 (25.30 to 25.39)                     | 49,312         | 1,228,010    | 40.16 (39.80 to 40.51)     | 39.70 (39.64 to 39.75)                     |
| 2003 | 147,516        | 5,181,238    | 28.47 (28.33 to 28.62)     | 28.19 (28.14 to 28.23)                     | 61,182         | 1,482,419    | 41.27 (40.94 to 41.60)     | 40.87 (40.81 to 40.93)                     |
| 2004 | 165,639        | 5,235,441    | 31.64 (31.49 to 31.79)     | 31.38 (31.33 to 31.43)                     | 72,557         | 1,711,481    | 42.39 (42.09 to 42.70)     | 42.01 (41.95 to 42.07)                     |
| 2005 | 170,041        | 5,257,090    | 32.35 (32.19 to 32.50)     | 32.18 (32.12 to 32.23)                     | 82,314         | 1,915,150    | 42.98 (42.69 to 43.27)     | 42.73 (42.67 to 42.79)                     |
| 2006 | 172,810        | 5,317,234    | 32.50 (32.35 to 32.65)     | 32.36 (32.31 to 32.41)                     | 87,617         | 2,055,897    | 42.62 (42.34 to 42.90)     | 42.33 (42.27 to 42.39)                     |
| 2007 | 176,398        | 5,363,130    | 32.89 (32.74 to 33.04)     | 32.79 (32.74 to 32.84)                     | 89,186         | 2,098,283    | 42.50 (42.23 to 42.78)     | 42.26 (42.21 to 42.32)                     |
| 2008 | 179,564        | 5,450,701    | 32.94 (32.79 to 33.10)     | 32.87 (32.82 to 32.93)                     | 90,480         | 2,125,548    | 42.57 (42.29 to 42.85)     | 42.37 (42.31 to 42.43)                     |
| 2009 | 187,080        | 5,493,373    | 34.06 (33.90 to 34.21)     | 33.98 (33.93 to 34.04)                     | 91,679         | 2,124,245    | 43.16 (42.88 to 43.44)     | 42.96 (42.90 to 43.02)                     |
| 2010 | 188,509        | 5,571,145    | 33.84 (33.68 to 33.99)     | 33.75 (33.70 to 33.81)                     | 88,391         | 2,100,837    | 42.07 (41.80 to 42.35)     | 41.86 (41.80 to 41.92)                     |
| 2011 | 195,455        | 5,629,210    | 34.72 (34.57 to 34.88)     | 34.58 (34.53 to 34.64)                     | 87,061         | 2,055,142    | 42.36 (42.08 to 42.64)     | 42.13 (42.07 to 42.19)                     |
| 2012 | 197,371        | 5,679,782    | 34.75 (34.60 to 34.90)     | 34.61 (34.56 to 34.67)                     | 83,563         | 2,009,975    | 41.57 (41.29 to 41.86)     | 41.35 (41.29 to 41.41)                     |
| 2013 | 197,846        | 5,575,426    | 35.49 (35.33 to 35.64)     | 35.33 (35.28 to 35.39)                     | 76,900         | 1,871,411    | 41.09 (40.80 to 41.38)     | 40.85 (40.79 to 40.91)                     |
| 2014 | 200,626        | 5,527,640    | 36.30 (36.14 to 36.45)     | 36.15 (36.09 to 36.20)                     | 66,900         | 1,655,953    | 40.40 (40.09 to 40.71)     | 40.18 (40.12 to 40.23)                     |
| 2015 | 198,489        | 5,587,077    | 35.53 (35.37 to 35.68)     | 35.41 (35.36 to 35.46)                     | 51,191         | 1,343,676    | 38.10 (37.77 to 38.43)     | 37.86 (37.81 to 37.92)                     |
| 2016 | 194,823        | 5,701,288    | 34.17 (34.02 to 34.32)     | 34.07 (34.02 to 34.13)                     | 34,266         | 962,723      | 35.59 (35.22 to 35.97)     | 35.37 (35.31 to 35.42)                     |
| 2017 | 192,250        | 5,825,484    | 33.00 (32.85 to 33.15)     | 32.90 (32.85 to 32.95)                     | 25,435         | 753,876      | 33.74 (33.32 to 34.15)     | 33.64 (33.59 to 33.69)                     |
| 2018 | 191,039        | 6,024,216    | 31.71 (31.57 to 31.85)     | 31.62 (31.57 to 31.67)                     | 20,522         | 642,415      | 31.95 (31.51 to 32.38)     | 31.77 (31.72 to 31.82)                     |
| 2019 | 187,723        | 6,076,392    | 30.89 (30.75 to 31.03)     | 30.79 (30.74 to 30.84)                     | 16,643         | 545,109      | 30.53 (30.07 to 31.00)     | 30.32 (30.27 to 30.37)                     |

*IR Incidence rate (per 1,000 person-years aged 15+ years)*

**Table S6. Comparative estimates from CPRD Aurum and CPRD GOLD databases of annual consultation prevalence of low back pain: England, 2000-2019**

*Standard population = mid-2019 English population aged 15+ years (ONS code: E92000001)*

| Year                                                              | CPRD Aurum     |              |                                                     |                                                                     | CPRD GOLD      |              |                                                     |                                                                     |
|-------------------------------------------------------------------|----------------|--------------|-----------------------------------------------------|---------------------------------------------------------------------|----------------|--------------|-----------------------------------------------------|---------------------------------------------------------------------|
|                                                                   | Prevalent Case | Person-years | Crude prevalence PR (95%CI), per 1,000 person-years | Age-sex-standardised prevalence PR (95% CI), per 1,000 person-years | Prevalent Case | Person-years | Crude prevalence PR (95%CI), per 1,000 person-years | Age-sex-standardised prevalence PR (95% CI), per 1,000 person-years |
| 2000                                                              | 139,705        | 5,382,312    | 25.96 (25.82 to 26.09)                              | 25.46 (25.42 to 25.51)                                              | 56,540         | 1,086,243    | 52.05 (51.62 to 52.48)                              | 50.87 (50.80 to 50.93)                                              |
| 2001                                                              | 163,147        | 5,531,932    | 29.49 (29.35 to 29.63)                              | 28.94 (28.89 to 28.98)                                              | 66,736         | 1,243,748    | 53.66 (53.25 to 54.06)                              | 52.39 (52.32 to 52.45)                                              |
| 2002                                                              | 191,152        | 5,710,359    | 33.47 (33.32 to 33.62)                              | 32.86 (32.80 to 32.91)                                              | 79,089         | 1,470,240    | 53.79 (53.42 to 54.17)                              | 52.57 (52.51 to 52.64)                                              |
| 2003                                                              | 218,879        | 5,851,571    | 37.41 (37.25 to 37.56)                              | 36.75 (36.70 to 36.81)                                              | 97,386         | 1,766,639    | 55.13 (54.78 to 55.47)                              | 54.00 (53.94 to 54.07)                                              |
| 2004                                                              | 251,109        | 5,987,032    | 41.94 (41.78 to 42.11)                              | 41.25 (41.19 to 41.30)                                              | 115,760        | 2,045,869    | 56.58 (56.26 to 56.91)                              | 55.42 (55.35 to 55.48)                                              |
| 2005                                                              | 267,538        | 6,083,037    | 43.98 (43.81 to 44.15)                              | 43.33 (43.27 to 43.39)                                              | 132,044        | 2,300,851    | 57.39 (57.08 to 57.70)                              | 56.35 (56.29 to 56.42)                                              |
| 2006                                                              | 280,633        | 6,207,393    | 45.21 (45.04 to 45.38)                              | 44.54 (44.48 to 44.60)                                              | 141,356        | 2,513,284    | 56.24 (55.95 to 56.54)                              | 55.20 (55.13 to 55.27)                                              |
| 2007                                                              | 292,360        | 6,300,948    | 46.40 (46.23 to 46.57)                              | 45.74 (45.67 to 45.80)                                              | 144,964        | 2,5772,07    | 56.25 (55.96 to 56.54)                              | 55.24 (55.17 to 55.31)                                              |
| 2008                                                              | 302,507        | 6,407,618    | 47.21 (47.04 to 47.38)                              | 46.55 (46.49 to 46.62)                                              | 147,916        | 2,599,580    | 56.90 (56.61 to 57.19)                              | 55.92 (55.86 to 55.99)                                              |
| 2009                                                              | 316,893        | 6,486,970    | 48.85 (48.68 to 49.02)                              | 48.15 (48.09 to 48.21)                                              | 150,546        | 2,612,542    | 57.62 (57.33 to 57.92)                              | 56.63 (56.56 to 56.70)                                              |
| 2010                                                              | 325,031        | 6,613,634    | 49.15 (48.98 to 49.31)                              | 48.38 (48.32 to 48.45)                                              | 146,701        | 2,619,616    | 56.00 (55.71 to 56.29)                              | 55.00 (54.94 to 55.07)                                              |
| 2011                                                              | 338,559        | 6,702,767    | 50.51 (50.34 to 50.68)                              | 49.68 (49.61 to 49.74)                                              | 145,263        | 2,569,076    | 56.54 (56.25 to 56.83)                              | 55.50 (55.43 to 55.57)                                              |
| 2012                                                              | 345,330        | 6,751,698    | 51.15 (50.98 to 51.32)                              | 50.27 (50.20 to 50.33)                                              | 140,236        | 2,474,697    | 56.67 (56.37 to 56.96)                              | 55.65 (55.58 to 55.72)                                              |
| 2013                                                              | 346,713        | 6,818,946    | 50.85 (50.68 to 51.01)                              | 49.99 (49.92 to 50.05)                                              | 129,843        | 2,401,578    | 54.07 (53.77 to 54.36)                              | 53.09 (53.02 to 53.15)                                              |
| 2014                                                              | 347,895        | 6,663,727    | 52.21 (52.03 to 52.38)                              | 51.26 (51.19 to 51.32)                                              | 113,252        | 2,187,052    | 51.78 (51.48 to 52.08)                              | 50.80 (50.73 to 50.86)                                              |
| 2015                                                              | 343,397        | 6,722,695    | 51.08 (50.91 to 51.25)                              | 50.21 (50.15 to 50.28)                                              | 87,128         | 1,840,532    | 47.34 (47.02 to 47.65)                              | 46.46 (46.40 to 46.52)                                              |
| 2016                                                              | 335,994        | 6,808,112    | 49.35 (49.19 to 49.52)                              | 48.51 (48.45 to 48.58)                                              | 57,651         | 1,314,009    | 43.87 (43.52 to 44.23)                              | 42.98 (42.92 to 43.04)                                              |
| 2017                                                              | 326,601        | 6,936,165    | 47.09 (46.93 to 47.25)                              | 46.28 (46.22 to 46.34)                                              | 42,047         | 993,228      | 42.33 (41.93 to 42.74)                              | 41.61 (41.55 to 41.67)                                              |
| 2018                                                              | 320,862        | 7,150,394    | 44.87 (44.72 to 45.03)                              | 44.14 (44.08 to 44.20)                                              | 33,663         | 812,623      | 41.43 (40.98 to 41.87)                              | 40.70 (40.64 to 40.76)                                              |
| 2019                                                              | 311,043        | 7,274,733    | 42.76 (42.61 to 42.91)                              | 42.04 (41.98 to 42.10)                                              | 27,294         | 704,293      | 38.75 (38.29 to 39.21)                              | 37.97 (37.92 to 38.03)                                              |
| <i>PR Prevalence rate (per 1,000 person-years aged 15+ years)</i> |                |              |                                                     |                                                                     |                |              |                                                     |                                                                     |

**Table S7. Comparative estimates from CPRD Aurum and CPRD GOLD databases of annual consultation incidence of osteoarthritis: England, 2000-2019**

*Standard population = mid-2019 English population aged 45+ years (ONS code: E92000001)*

| Year | CPRD Aurum    |              |                            |                                            | CPRD GOLD     |              |                            |                                            |
|------|---------------|--------------|----------------------------|--------------------------------------------|---------------|--------------|----------------------------|--------------------------------------------|
|      | Incident Case | Person-years | Crude incidence IR (95%CI) | Age-sex-standardised incidence IR (95% CI) | Incident Case | Person-years | Crude incidence IR (95%CI) | Age-sex-standardised incidence IR (95% CI) |
| 2000 | 41,297        | 3,726,184    | 11.08 (10.98 to 11.19)     | 11.95 (11.91 to 11.99)                     | 11,336        | 748,786      | 15.14 (14.86 to 15.42)     | 16.27 (16.23 to 16.32)                     |
| 2001 | 46,289        | 3,826,678    | 12.10 (11.99 to 12.21)     | 13.09 (13.05 to 13.13)                     | 13,331        | 858,565      | 15.53 (15.26 to 15.79)     | 16.60 (16.56 to 16.65)                     |
| 2002 | 52,515        | 3,939,946    | 13.33 (13.21 to 13.44)     | 14.49 (14.45 to 14.53)                     | 16,034        | 1,013,965    | 15.81 (15.57 to 16.06)     | 16.96 (16.91 to 17.00)                     |
| 2003 | 57,478        | 4,029,882    | 14.26 (14.15 to 14.38)     | 15.58 (15.54 to 15.62)                     | 19,712        | 1,227,087    | 16.06 (15.84 to 16.29)     | 17.23 (17.18 to 17.27)                     |
| 2004 | 62,820        | 4,103,784    | 15.31 (15.19 to 15.43)     | 16.88 (16.83 to 16.92)                     | 22,951        | 1,422,206    | 16.14 (15.93 to 16.35)     | 17.37 (17.33 to 17.42)                     |
| 2005 | 61,026        | 4,154,130    | 14.69 (14.57 to 14.81)     | 16.32 (16.28 to 16.36)                     | 25,392        | 1,596,500    | 15.90 (15.71 to 16.10)     | 17.20 (17.16 to 17.25)                     |
| 2006 | 58,031        | 4,238,632    | 13.69 (13.58 to 13.80)     | 15.28 (15.24 to 15.32)                     | 25,619        | 1,724,766    | 14.85 (14.67 to 15.04)     | 15.99 (15.95 to 16.04)                     |
| 2007 | 59,613        | 4,302,949    | 13.85 (13.74 to 13.97)     | 15.45 (15.41 to 15.49)                     | 25,984        | 1,767,655    | 14.70 (14.52 to 14.88)     | 15.81 (15.76 to 15.85)                     |
| 2008 | 62,582        | 4,386,375    | 14.27 (14.16 to 14.38)     | 15.86 (15.82 to 15.90)                     | 26,796        | 1,794,158    | 14.94 (14.76 to 15.11)     | 15.99 (15.95 to 16.04)                     |
| 2009 | 64,509        | 4,430,389    | 14.56 (14.45 to 14.67)     | 16.09 (16.05 to 16.14)                     | 26,392        | 1,793,377    | 14.72 (14.54 to 14.89)     | 15.66 (15.61 to 15.70)                     |
| 2010 | 64,320        | 4,496,850    | 14.30 (14.19 to 14.41)     | 15.75 (15.71 to 15.80)                     | 24,291        | 1,773,889    | 13.69 (13.52 to 13.87)     | 14.48 (14.44 to 14.52)                     |
| 2011 | 64,993        | 4,548,278    | 14.29 (14.18 to 14.40)     | 15.62 (15.58 to 15.66)                     | 23,654        | 1,735,116    | 13.63 (13.46 to 13.81)     | 14.26 (14.22 to 14.31)                     |
| 2012 | 65,775        | 4,589,311    | 14.33 (14.22 to 14.44)     | 15.50 (15.46 to 15.54)                     | 22,060        | 1,694,464    | 13.02 (12.85 to 13.19)     | 13.46 (13.42 to 13.50)                     |
| 2013 | 69,776        | 4,502,026    | 15.50 (15.38 to 15.61)     | 16.59 (16.55 to 16.63)                     | 20,456        | 1,573,831    | 13.00 (12.82 to 13.18)     | 13.34 (13.30 to 13.38)                     |
| 2014 | 72,919        | 4,459,855    | 16.35 (16.23 to 16.47)     | 17.41 (17.36 to 17.45)                     | 17,816        | 1,392,447    | 12.79 (12.61 to 12.98)     | 13.07 (13.03 to 13.11)                     |
| 2015 | 75,984        | 4,489,945    | 16.92 (16.80 to 17.04)     | 17.96 (17.91 to 18.01)                     | 14,022        | 1,126,640    | 12.45 (12.24 to 12.65)     | 12.68 (12.64 to 12.72)                     |
| 2016 | 78,811        | 4,552,688    | 17.31 (17.19 to 17.43)     | 18.32 (18.28 to 18.37)                     | 9,445         | 802,149      | 11.77 (11.54 to 12.01)     | 12.05 (12.01 to 12.09)                     |
| 2017 | 81,131        | 4,615,523    | 17.58 (17.46 to 17.70)     | 18.56 (18.52 to 18.61)                     | 7,002         | 620,960      | 11.28 (11.01 to 11.54)     | 11.76 (11.72 to 11.79)                     |
| 2018 | 84,007        | 4,724,427    | 17.78 (17.66 to 17.90)     | 18.75 (18.70 to 18.79)                     | 5,902         | 526,330      | 11.21 (10.93 to 11.50)     | 11.65 (11.61 to 11.68)                     |
| 2019 | 86,788        | 4,720,838    | 18.38 (18.26 to 18.51)     | 19.34 (19.30 to 19.39)                     | 5,065         | 443,826      | 11.41 (11.10 to 11.73)     | 11.82 (11.78 to 11.85)                     |

**Table S8. Comparative estimates from CPRD Aurum and CPRD GOLD databases of annual consultation prevalence of osteoarthritis: England, 2000-2019**

Standard population = mid-2019 English population aged 45+ years (ONS code: E92000001)

| Year | CPRD Aurum     |              |                             |                                             | CPRD GOLD      |              |                             |                                             |
|------|----------------|--------------|-----------------------------|---------------------------------------------|----------------|--------------|-----------------------------|---------------------------------------------|
|      | Prevalent Case | Person-years | Crude prevalence PR (95%CI) | Age-sex-standardised prevalence PR (95% CI) | Prevalent Case | Person-years | Crude prevalence PR (95%CI) | Age-sex-standardised prevalence PR (95% CI) |
| 2000 | 65,016         | 3,967,884    | 16.39 (16.26 to 16.51)      | 17.16 (17.12 to 17.21)                      | 17,911         | 814,548      | 21.99 (21.67 to 22.31)      | 22.61 (22.56 to 22.66)                      |
| 2001 | 74,369         | 4,092,779    | 18.17 (18.04 to 18.30)      | 19.06 (19.01 to 19.10)                      | 20,695         | 938,039      | 22.06 (21.76 to 22.36)      | 22.60 (22.55 to 22.65)                      |
| 2002 | 86,367         | 4,236,826    | 20.38 (20.25 to 20.52)      | 21.37 (21.32 to 21.42)                      | 24,877         | 1,109,806    | 22.42 (22.14 to 22.69)      | 22.98 (22.93 to 23.04)                      |
| 2003 | 97,386         | 4,352,236    | 22.38 (22.24 to 22.52)      | 23.48 (23.42 to 23.53)                      | 29,937         | 1,337,287    | 22.39 (22.13 to 22.64)      | 22.97 (22.92 to 23.02)                      |
| 2004 | 110,383        | 4,457,156    | 24.77 (24.62 to 24.91)      | 26.08 (26.02 to 26.13)                      | 34,799         | 1,549,914    | 22.45 (22.22 to 22.69)      | 23.08 (23.03 to 23.13)                      |
| 2005 | 115,214        | 4,533,140    | 25.42 (25.27 to 25.56)      | 26.86 (26.80 to 26.92)                      | 38,332         | 1,739,599    | 22.03 (21.81 to 22.26)      | 22.74 (22.69 to 22.79)                      |
| 2006 | 114,273        | 4,635,488    | 24.65 (24.51 to 24.79)      | 26.12 (26.06 to 26.17)                      | 38,305         | 1,902,462    | 20.13 (19.93 to 20.34)      | 20.70 (20.65 to 20.75)                      |
| 2007 | 118,393        | 4,710,160    | 25.14 (24.99 to 25.28)      | 26.61 (26.55 to 26.66)                      | 38,213         | 1,951,354    | 19.58 (19.39 to 19.78)      | 20.09 (20.04 to 20.14)                      |
| 2008 | 123,488        | 4,789,563    | 25.78 (25.64 to 25.93)      | 27.22 (27.17 to 27.28)                      | 38,711         | 1,964,753    | 19.70 (19.51 to 19.90)      | 20.17 (20.12 to 20.22)                      |
| 2009 | 127,250        | 4,845,469    | 26.26 (26.12 to 26.41)      | 27.56 (27.50 to 27.62)                      | 37,950         | 1,970,842    | 19.26 (19.06 to 19.45)      | 19.60 (19.55 to 19.64)                      |
| 2010 | 129,243        | 4,934,739    | 26.19 (26.05 to 26.33)      | 27.40 (27.35 to 27.46)                      | 34,789         | 1,971,838    | 17.64 (17.46 to 17.83)      | 17.89 (17.85 to 17.94)                      |
| 2011 | 130,973        | 4,997,893    | 26.21 (26.06 to 26.35)      | 27.23 (27.17 to 27.29)                      | 33,543         | 1,930,298    | 17.38 (17.19 to 17.56)      | 17.48 (17.43 to 17.52)                      |
| 2012 | 131,863        | 5,025,291    | 26.24 (26.10 to 26.38)      | 26.95 (26.89 to 27.00)                      | 31,097         | 1,853,221    | 16.78 (16.59 to 16.97)      | 16.70 (16.65 to 16.74)                      |
| 2013 | 134,772        | 5,060,009    | 26.63 (26.49 to 26.78)      | 27.14 (27.09 to 27.20)                      | 28,509         | 1,792,690    | 15.90 (15.72 to 16.09)      | 15.72 (15.68 to 15.76)                      |
| 2014 | 136,845        | 4,932,601    | 27.74 (27.60 to 27.89)      | 28.06 (28.00 to 28.11)                      | 24,779         | 1,633,535    | 15.17 (14.98 to 15.36)      | 14.93 (14.89 to 14.97)                      |
| 2015 | 141,228        | 4,970,140    | 28.42 (28.27 to 28.56)      | 28.62 (28.56 to 28.68)                      | 19,511         | 1,374,740    | 14.19 (13.99 to 14.39)      | 13.96 (13.92 to 14.00)                      |
| 2016 | 145,145        | 5,021,526    | 28.90 (28.76 to 29.05)      | 29.00 (28.94 to 29.06)                      | 12,861         | 984,515      | 13.06 (12.84 to 13.29)      | 12.82 (12.78 to 12.86)                      |
| 2017 | 147,938        | 5,104,896    | 28.98 (28.83 to 29.13)      | 29.02 (28.96 to 29.08)                      | 9,355          | 737,557      | 12.68 (12.43 to 12.94)      | 12.77 (12.73 to 12.81)                      |
| 2018 | 151,592        | 5,246,027    | 28.90 (28.75 to 29.04)      | 28.86 (28.80 to 28.92)                      | 7,772          | 604,000      | 12.87 (12.58 to 13.15)      | 13.01 (12.97 to 13.05)                      |
| 2019 | 155,713        | 5,320,903    | 29.26 (29.12 to 29.41)      | 29.15 (29.10 to 29.21)                      | 6,729          | 523,933      | 12.84 (12.54 to 13.15)      | 12.86 (12.82 to 12.90)                      |





**Table S9. Annual person-consulting prevalence of low back pain (without requirement for 3-year prior registration history): England, 2000-2019**

*Data source = CPRD Aurum*

*Standard population = mid-2019 English population aged 15+ years (ONS code: E92000001)*

| Year | Prevalent Case | Person-years | Crude prevalence PR (95%CI) | Age-sex-standardised prevalence PR (95% CI) |
|------|----------------|--------------|-----------------------------|---------------------------------------------|
| 2000 | 186,808        | 7,557,814    | 24.72 (24.61 to 24.83)      | 25.07 (25.02 to 25.11)                      |
| 2001 | 217,733        | 7,753,459    | 28.08 (27.96 to 28.20)      | 28.48 (28.44 to 28.53)                      |
| 2002 | 254,473        | 7,949,603    | 32.01 (31.89 to 32.14)      | 32.50 (32.45 to 32.55)                      |
| 2003 | 291,432        | 8,100,724    | 35.98 (35.85 to 36.11)      | 36.59 (36.54 to 36.65)                      |
| 2004 | 334,056        | 8,279,856    | 40.35 (40.21 to 40.48)      | 41.11 (41.05 to 41.17)                      |
| 2005 | 356,029        | 8,382,845    | 42.47 (42.33 to 42.61)      | 43.40 (43.34 to 43.46)                      |
| 2006 | 372,412        | 8,533,691    | 43.64 (43.50 to 43.78)      | 44.66 (44.60 to 44.72)                      |
| 2007 | 389,325        | 8,668,961    | 44.91 (44.77 to 45.05)      | 45.97 (45.91 to 46.03)                      |
| 2008 | 400,941        | 8,768,024    | 45.73 (45.59 to 45.87)      | 46.85 (46.79 to 46.92)                      |
| 2009 | 418,572        | 8,866,783    | 47.21 (47.06 to 47.35)      | 48.35 (48.28 to 48.41)                      |
| 2010 | 427,415        | 8,997,417    | 47.50 (47.36 to 47.65)      | 48.62 (48.55 to 48.68)                      |
| 2011 | 442,007        | 9,087,897    | 48.64 (48.49 to 48.78)      | 49.81 (49.74 to 49.87)                      |
| 2012 | 451,257        | 9,188,311    | 49.11 (48.97 to 49.26)      | 50.22 (50.16 to 50.29)                      |
| 2013 | 454,405        | 9,309,087    | 48.81 (48.67 to 48.95)      | 49.90 (49.84 to 49.97)                      |
| 2014 | 459,286        | 9,268,588    | 49.55 (49.41 to 49.70)      | 50.62 (50.56 to 50.69)                      |
| 2015 | 456,117        | 9,401,700    | 48.51 (48.37 to 48.66)      | 49.50 (49.44 to 49.56)                      |
| 2016 | 446,608        | 9,560,907    | 46.71 (46.57 to 46.85)      | 47.73 (47.66 to 47.79)                      |
| 2017 | 433,619        | 9,754,214    | 44.45 (44.32 to 44.59)      | 45.48 (45.42 to 45.54)                      |
| 2018 | 422,586        | 9,961,238    | 42.42 (42.30 to 42.55)      | 43.46 (43.40 to 43.52)                      |
| 2019 | 408,876        | 10,113,093   | 40.43 (40.31 to 40.55)      | 41.52 (41.46 to 41.58)                      |

**Table S10. Annual consultation prevalence of osteoarthritis (without requirement for 3-year prior registration history): England, 2000-2019**

*Data source = CPRD Aurum*

*Standard population = mid-2019 English population aged 45+ years (ONS code: E92000001)*

| Year | Prevalent Case | Person-years | Crude prevalence<br>PR (95%CI) | Age-sex-standardised prevalence<br>PR (95% CI) |
|------|----------------|--------------|--------------------------------|------------------------------------------------|
| 2000 | 77,450         | 4,977,949    | 15.56 (15.45 to 15.67)         | 17.00 (16.95 to 17.04)                         |
| 2001 | 88,322         | 5,122,753    | 17.24 (17.13 to 17.35)         | 18.90 (18.85 to 18.94)                         |
| 2002 | 101,614        | 5,266,355    | 19.29 (19.18 to 19.41)         | 21.18 (21.13 to 21.23)                         |
| 2003 | 114,093        | 5,375,872    | 21.22 (21.10 to 21.35)         | 23.37 (23.32 to 23.42)                         |
| 2004 | 128,821        | 5,497,006    | 23.43 (23.31 to 23.56)         | 25.95 (25.89 to 26.00)                         |
| 2005 | 133,979        | 5,564,452    | 24.08 (23.95 to 24.21)         | 26.81 (26.76 to 26.87)                         |
| 2006 | 132,593        | 5,671,369    | 23.38 (23.25 to 23.51)         | 26.16 (26.10 to 26.21)                         |
| 2007 | 137,346        | 5,764,886    | 23.82 (23.70 to 23.95)         | 26.67 (26.62 to 26.73)                         |
| 2008 | 142,390        | 5,823,583    | 24.45 (24.32 to 24.58)         | 27.32 (27.27 to 27.38)                         |
| 2009 | 146,087        | 5,878,200    | 24.85 (24.72 to 24.98)         | 27.62 (27.56 to 27.68)                         |
| 2010 | 148,159        | 5,960,326    | 24.86 (24.73 to 24.98)         | 27.51 (27.45 to 27.57)                         |
| 2011 | 149,759        | 6,014,070    | 24.90 (24.78 to 25.03)         | 27.34 (27.28 to 27.40)                         |
| 2012 | 151,166        | 6,073,859    | 24.89 (24.76 to 25.01)         | 27.00 (26.94 to 27.05)                         |
| 2013 | 155,130        | 6,150,778    | 25.22 (25.10 to 25.35)         | 27.18 (27.12 to 27.24)                         |
| 2014 | 159,278        | 6,108,324    | 26.08 (25.95 to 26.20)         | 27.92 (27.86 to 27.97)                         |
| 2015 | 165,708        | 6,208,239    | 26.69 (26.56 to 26.82)         | 28.45 (28.39 to 28.51)                         |
| 2016 | 170,853        | 6,305,829    | 27.09 (26.97 to 27.22)         | 28.79 (28.73 to 28.85)                         |
| 2017 | 173,550        | 6,426,991    | 27.00 (26.88 to 27.13)         | 28.61 (28.55 to 28.67)                         |
| 2018 | 175,688        | 6,550,857    | 26.82 (26.69 to 26.94)         | 28.34 (28.28 to 28.40)                         |
| 2019 | 179,661        | 6,634,035    | 27.08 (26.96 to 27.21)         | 28.56 (28.50 to 28.62)                         |

**Figure S1. Illustrative workflow chart for estimating annual person-consulting incidence of low back pain: West Midlands, 2017**

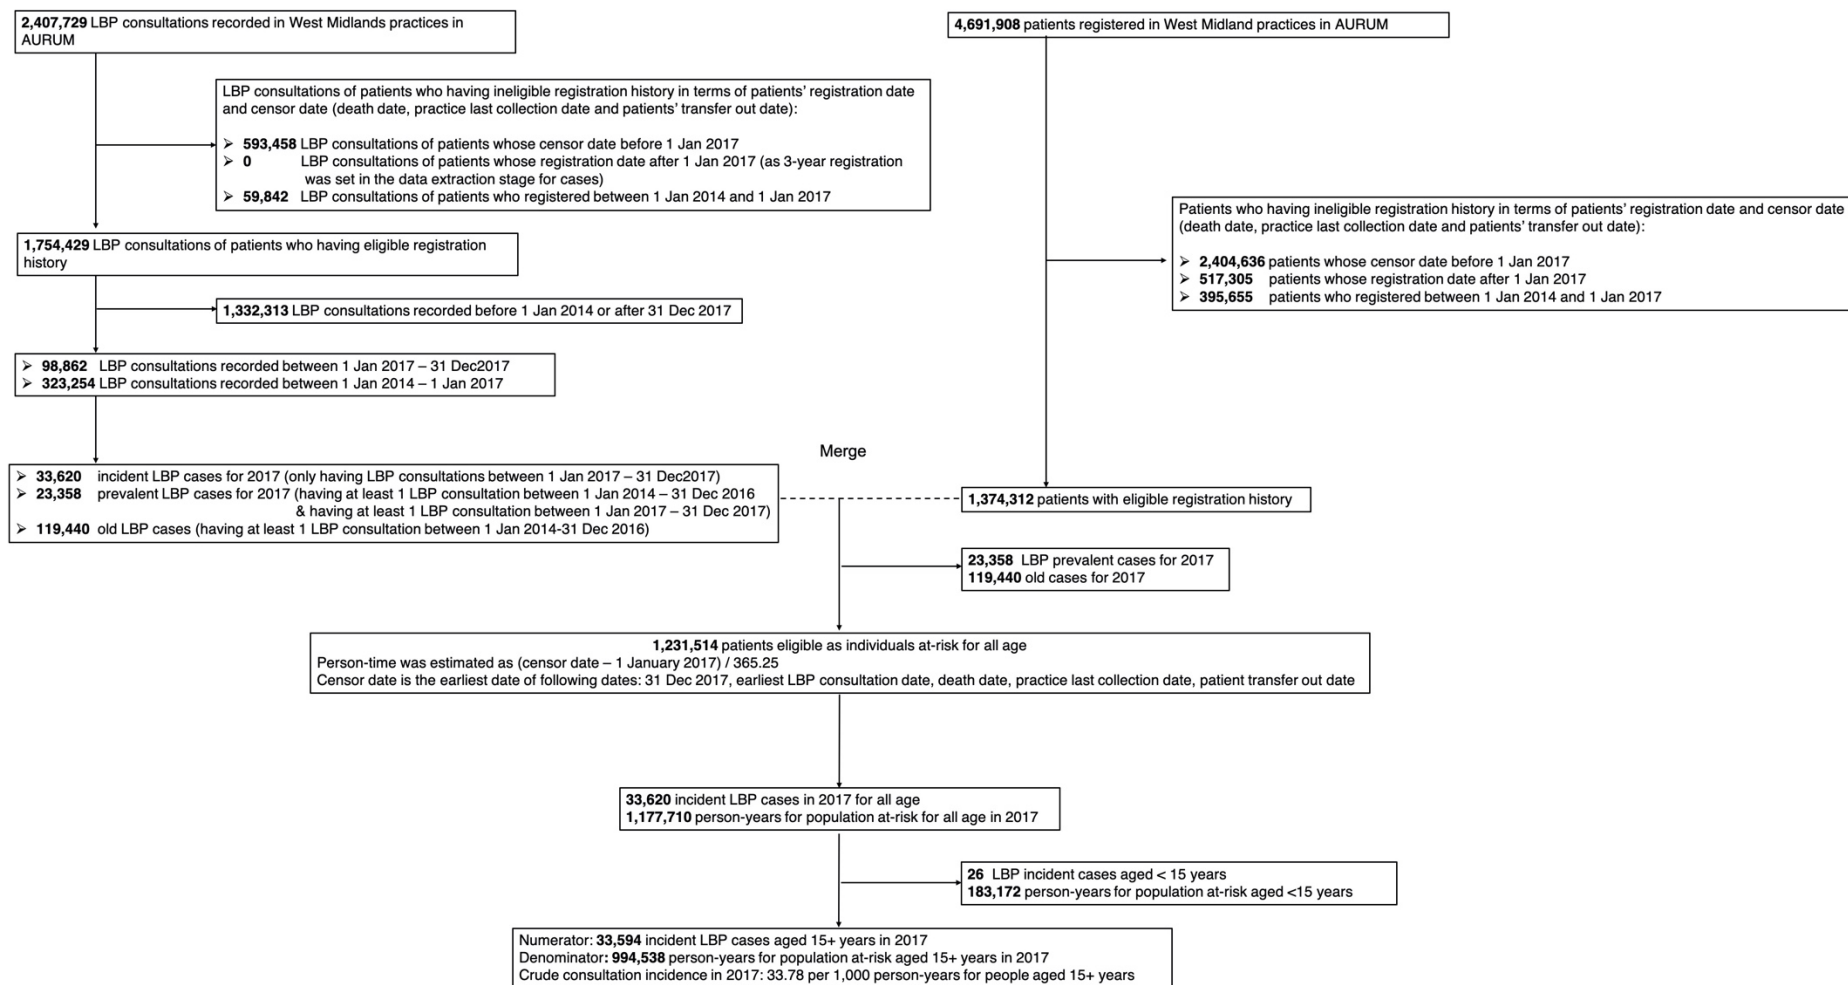

**Figure S2. Illustrative workflow chart for estimating annual person-consulting prevalence of low back pain: West Midlands, 2017**

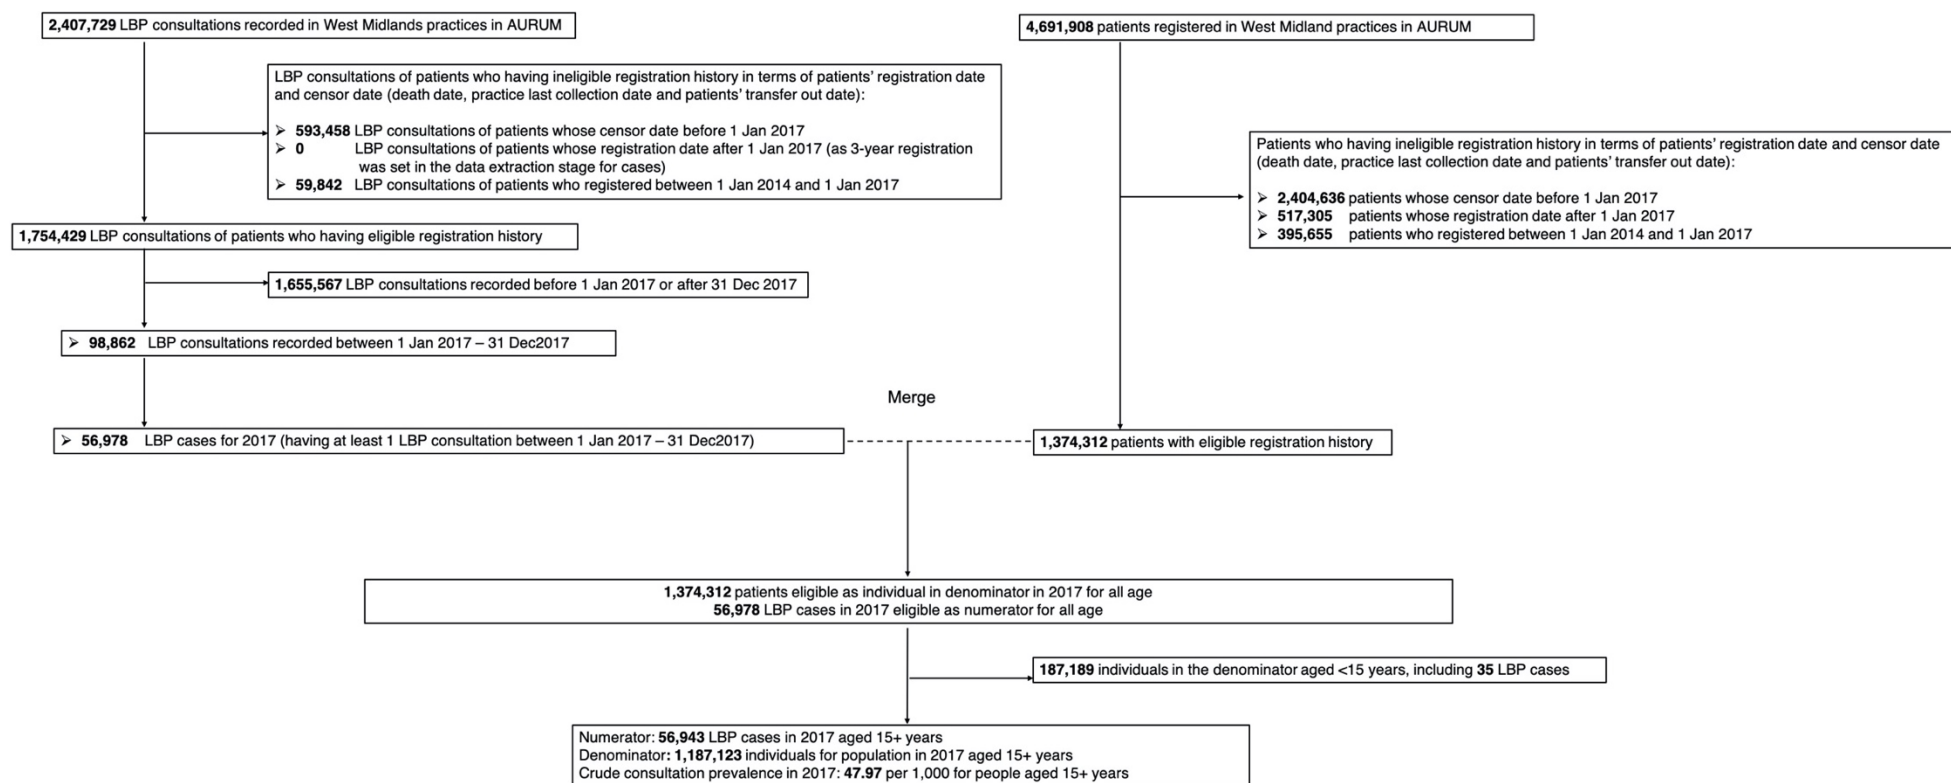



### Figure S3. Annual consultation incidence of low back pain, by age and sex: England, 2000-2019

Data source = CPRD Aurum

Black dot, red square and blue diamond indicates age-standardised incidence (per 1,000 person-years) for all, women and men, respectively.

Standard population = mid-2019 English population aged 15+ years (ONS code: E92000001)

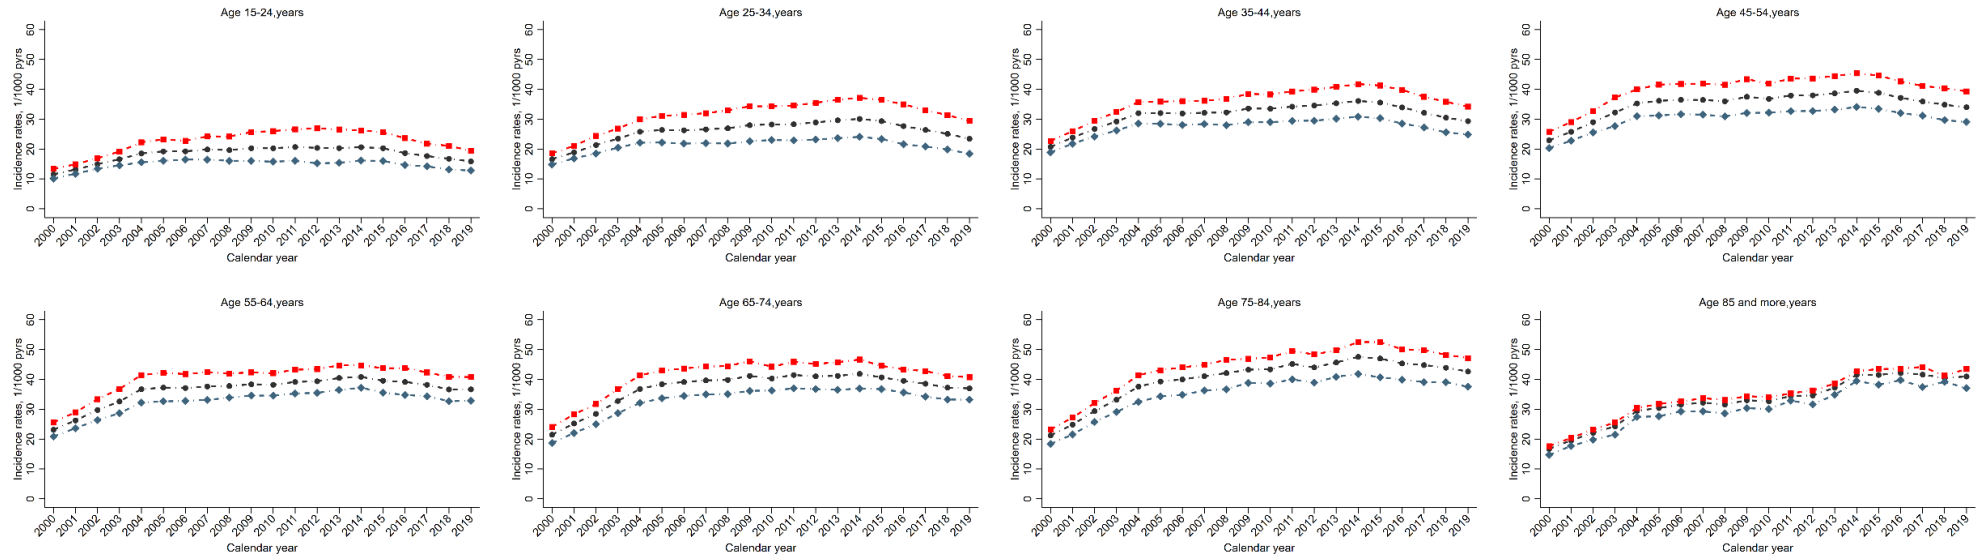

### Figure S4. Annual consultation prevalence of low back pain, by age and sex: England, 2000-2019

Data source = CPRD Aurum

Black dot, red square and blue diamond indicates age-standardised incidence (per 1,000 person-years) for all, women and men, respectively.

Standard population = mid-2019 English population aged 15+ years (ONS code: E92000001)

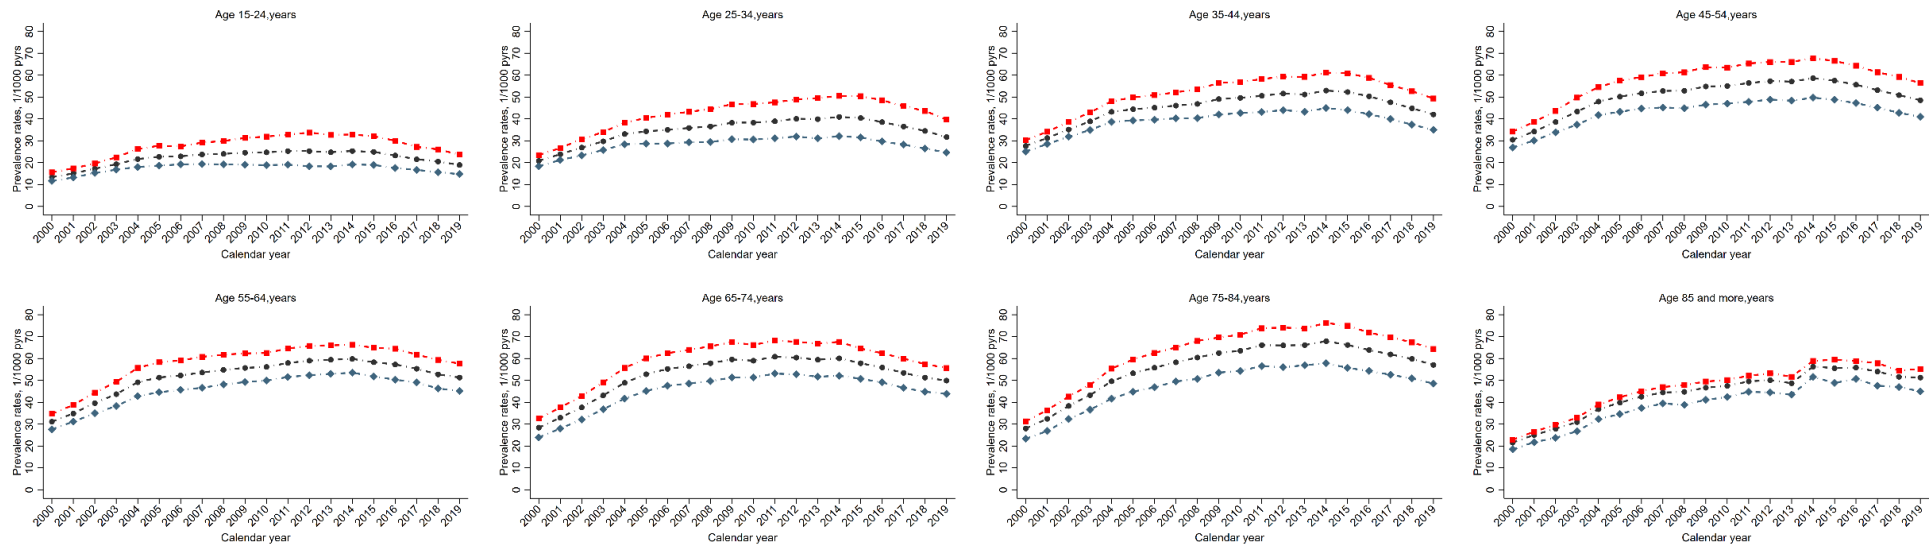



## Figure S5. Annual consultation incidence of low back pain, by region: England, 2000-2019

Data source = CPRD Aurum

Red dot line indicates the age-sex standardised consultation incidence (per 1,000 person-years) in the region. Grey line indicates the age-sex standardised consultation incidence in England.

Standard population = mid-2019 English population aged 15+ years (ONS code: E92000001)

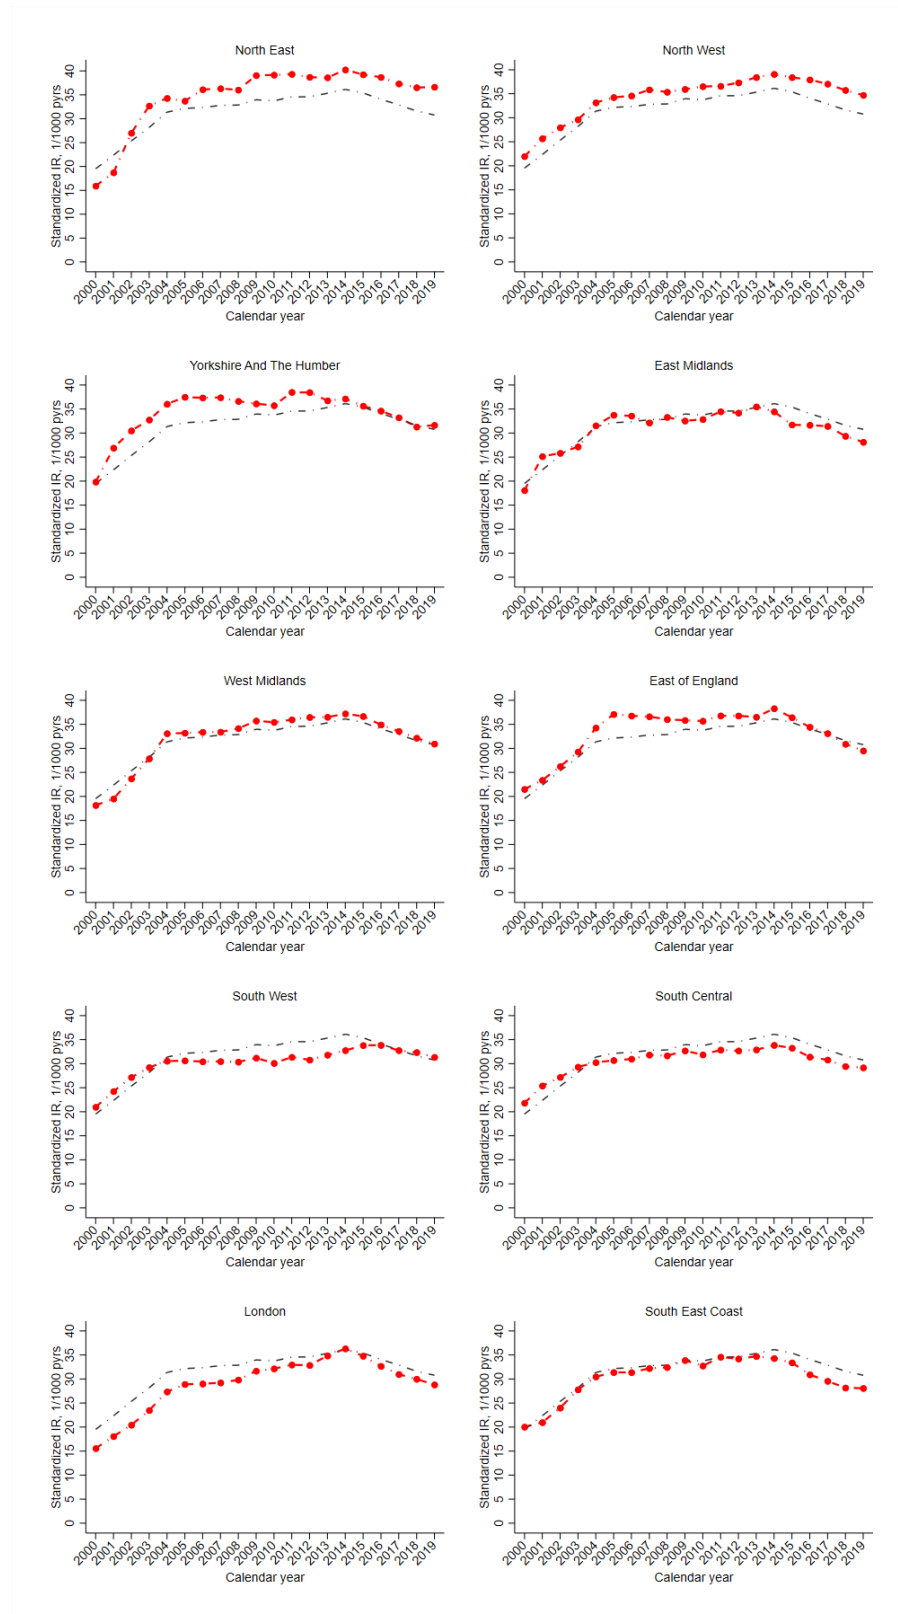

## Figure S6. Annual consultation prevalence of low back pain, by region: England, 2000-2019

Data source = CPRD Aurum

Red dot line indicates the age-sex standardised consultation incidence (per 1,000 person-years) in the region. Grey line indicates the age-sex standardised consultation incidence in England.

Standard population = mid-2019 English population aged 15+ years (ONS code: E92000001)

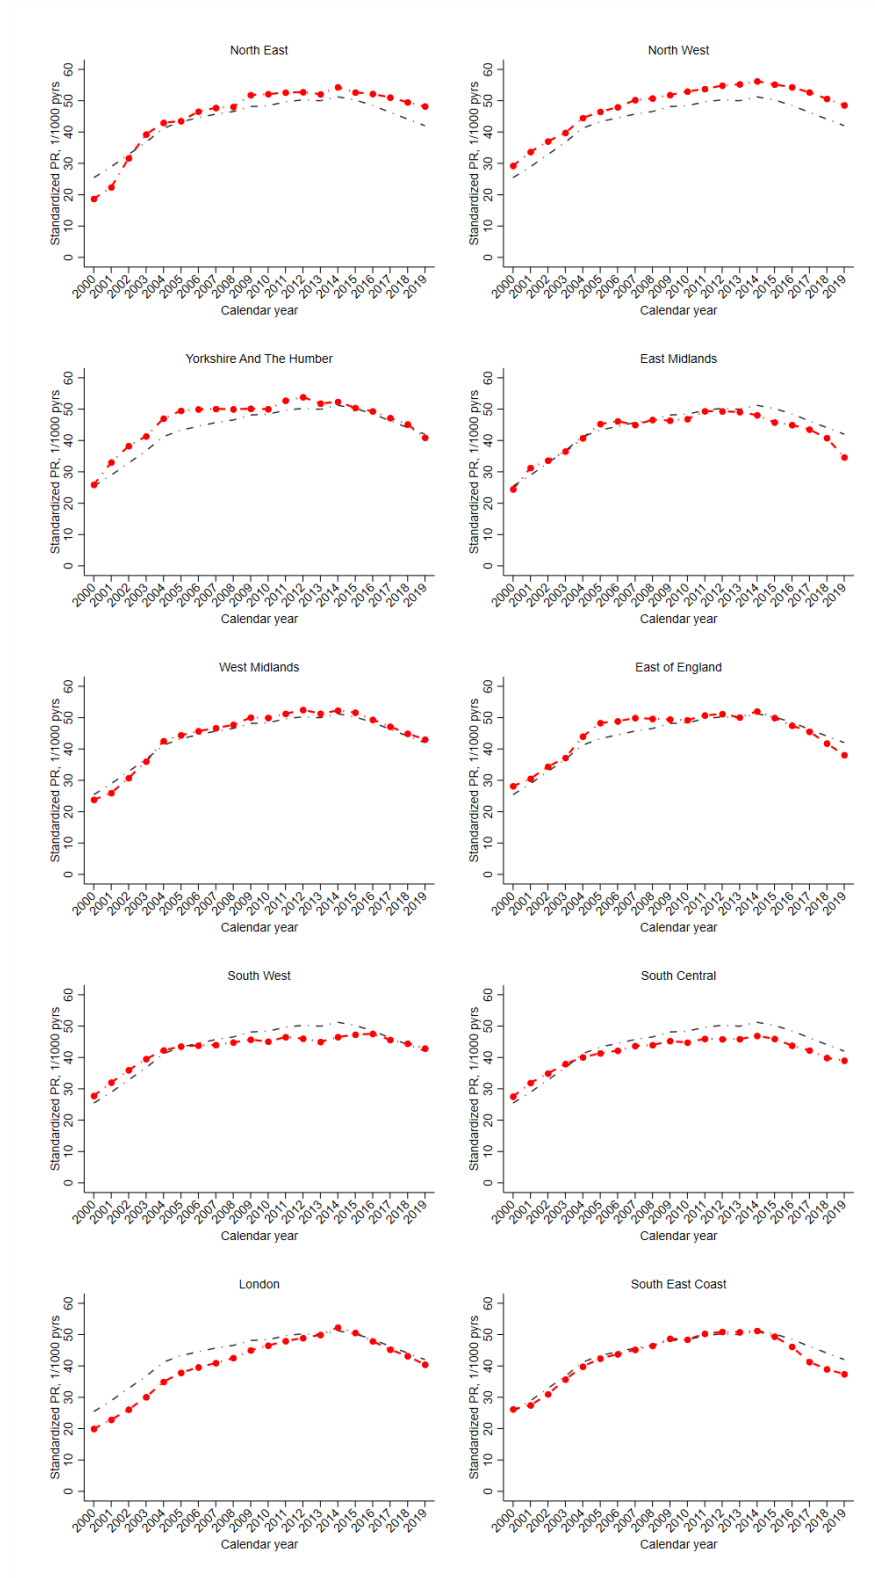

**Figure S7. Age-stratified primary care annual person-consulting incidence of diagnosed osteoarthritis, by sex: England, 2000-2019**

Data source = CPRD Aurum

Black dot, red square and blue diamond indicates age-standardised incidence (per 1,000 person-years) for all, women and men, respectively.

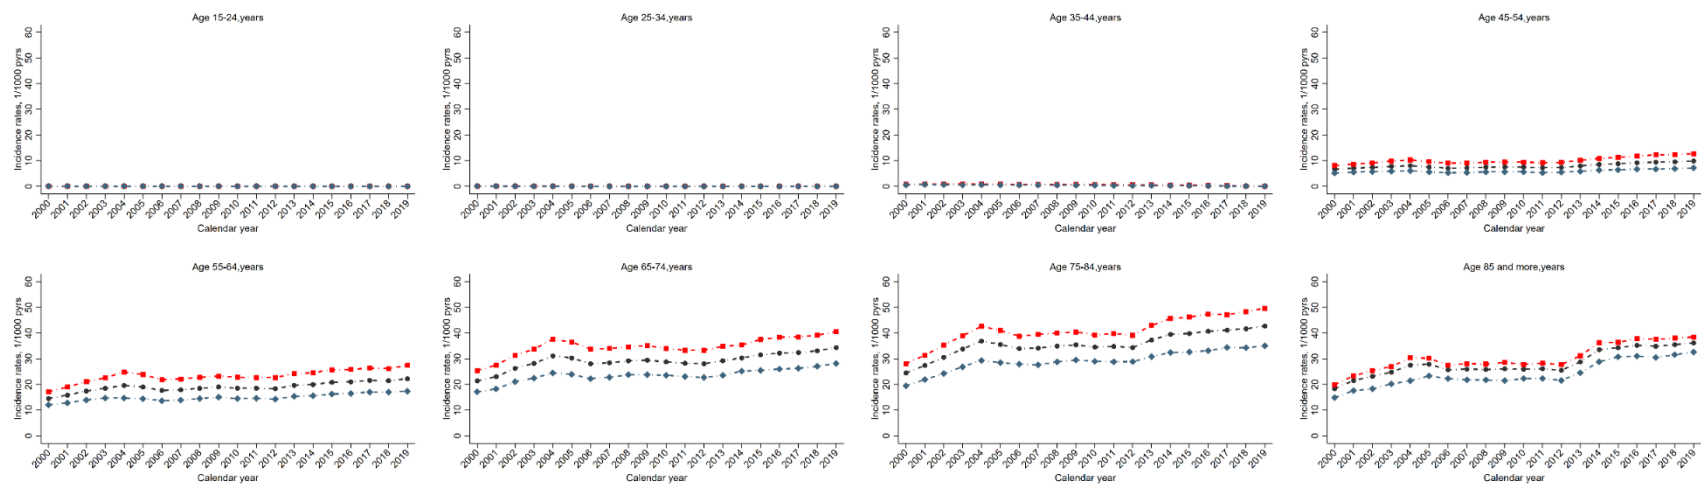

**Figure S8. Age-stratified primary care annual person-consulting prevalence of diagnosed osteoarthritis, by sex: England, 2000-2019**

Data source = CPRD Aurum

Black dot, red square and blue diamond indicates age-standardised prevalence (per 1,000 person-years) for all, women and men, respectively.

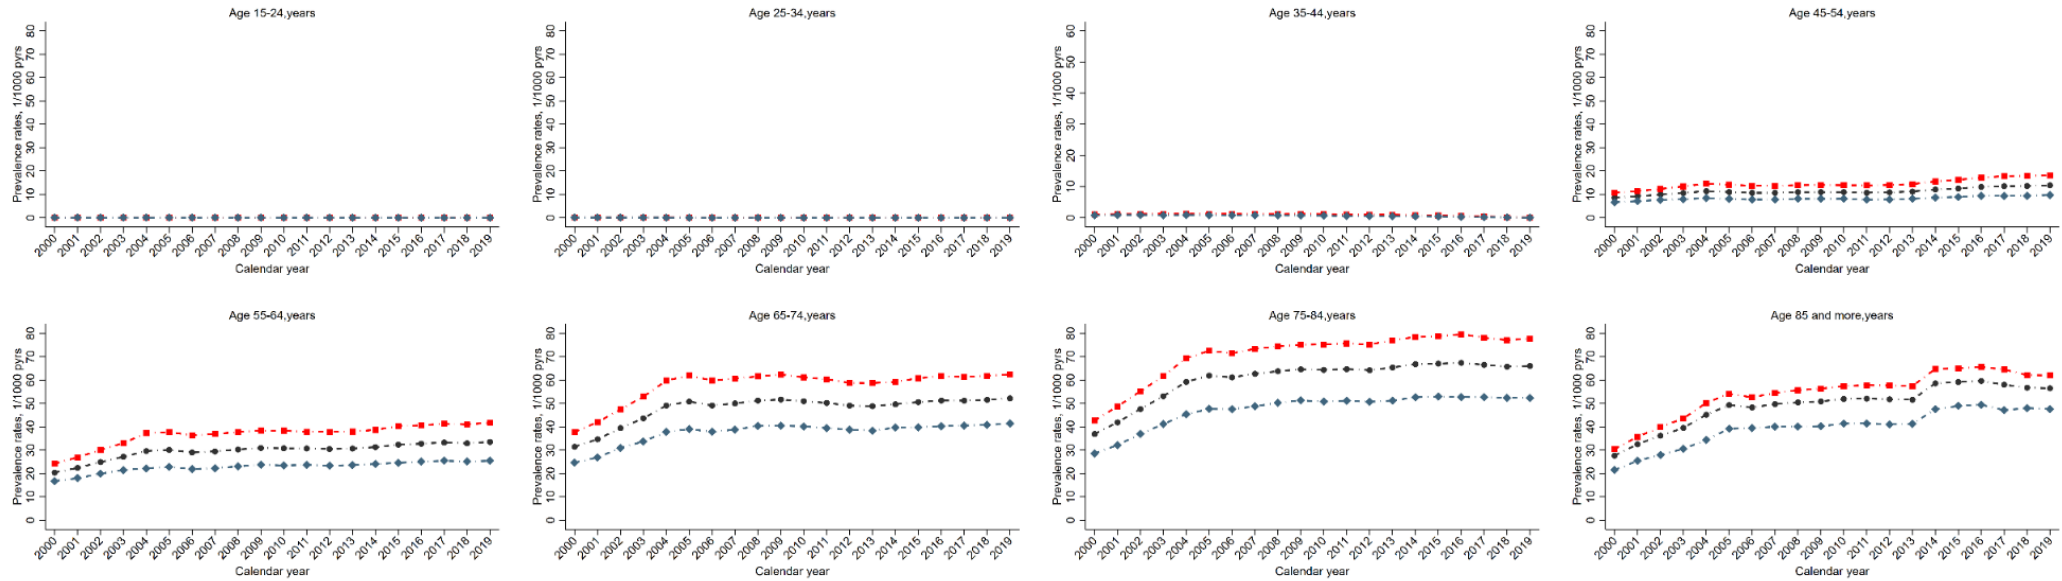

## Figure S9. Annual consultation incidence of osteoarthritis, by region: England, 2000-2019

Data source = CPRD Aurum

Red dot line indicates the age-sex standardised primary care consultation incidence (per 1,000 person-years) in the region. The grey line indicated the overall age-sex standardised primary care consultation incidence in England.

Standard population = mid-2019 English population aged 15+ years (ONS code: E92000001)

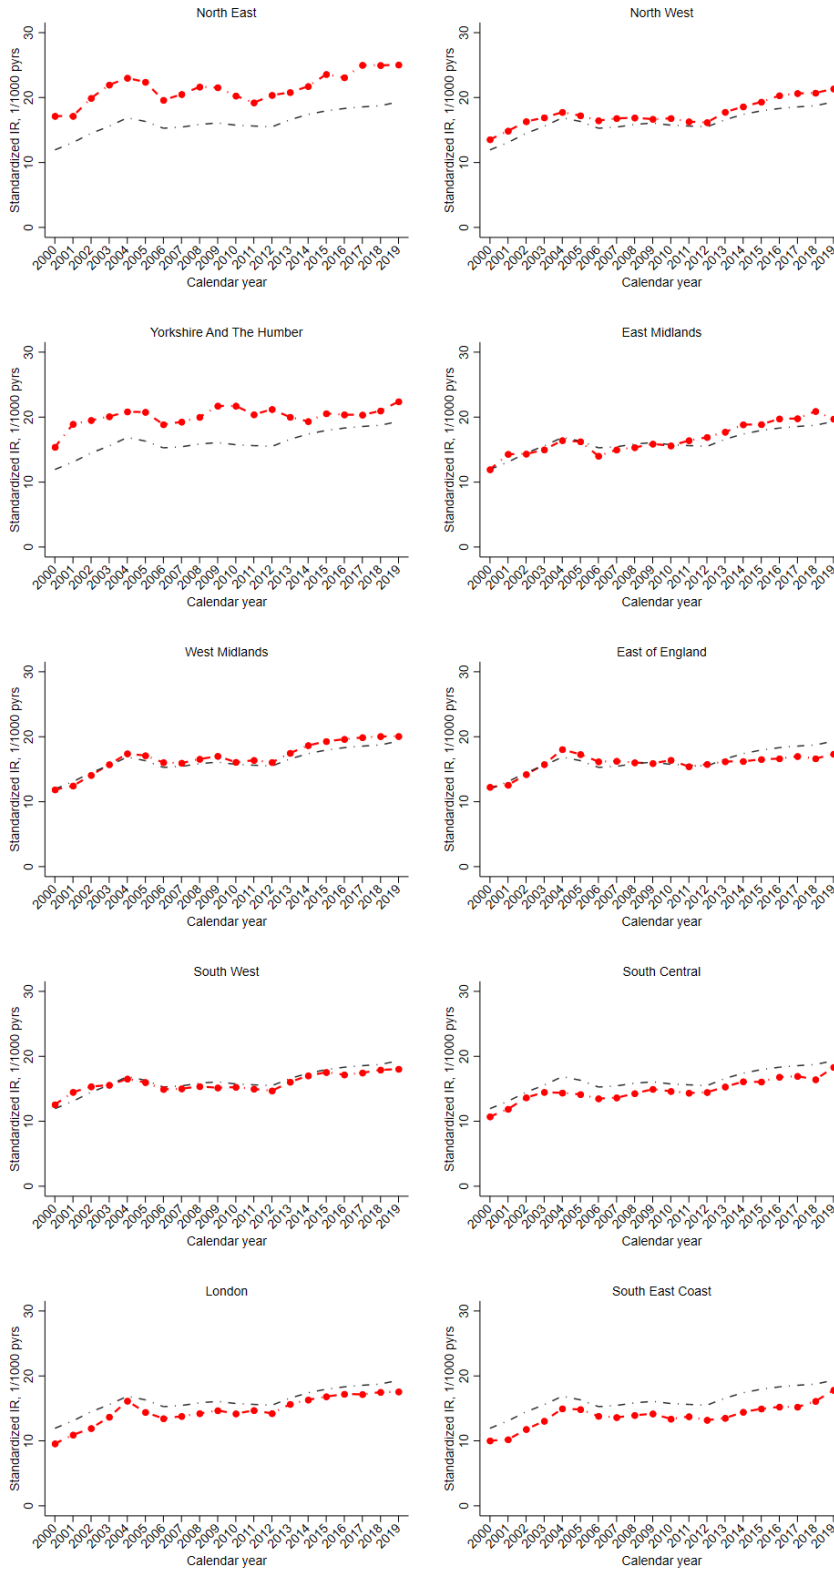

## Figure S10. Annual consultation prevalence of osteoarthritis, by region: England, 2000-2019

Data source = CPRD Aurum

Red dot line indicates the age-sex standardised primary care consultation prevalence (per 1,000 person-years) in the region. The grey line indicated the overall age-sex standardised annual consultation prevalence in England.

Standard population = mid-2019 English population aged 15+ years (ONS code: E92000001)

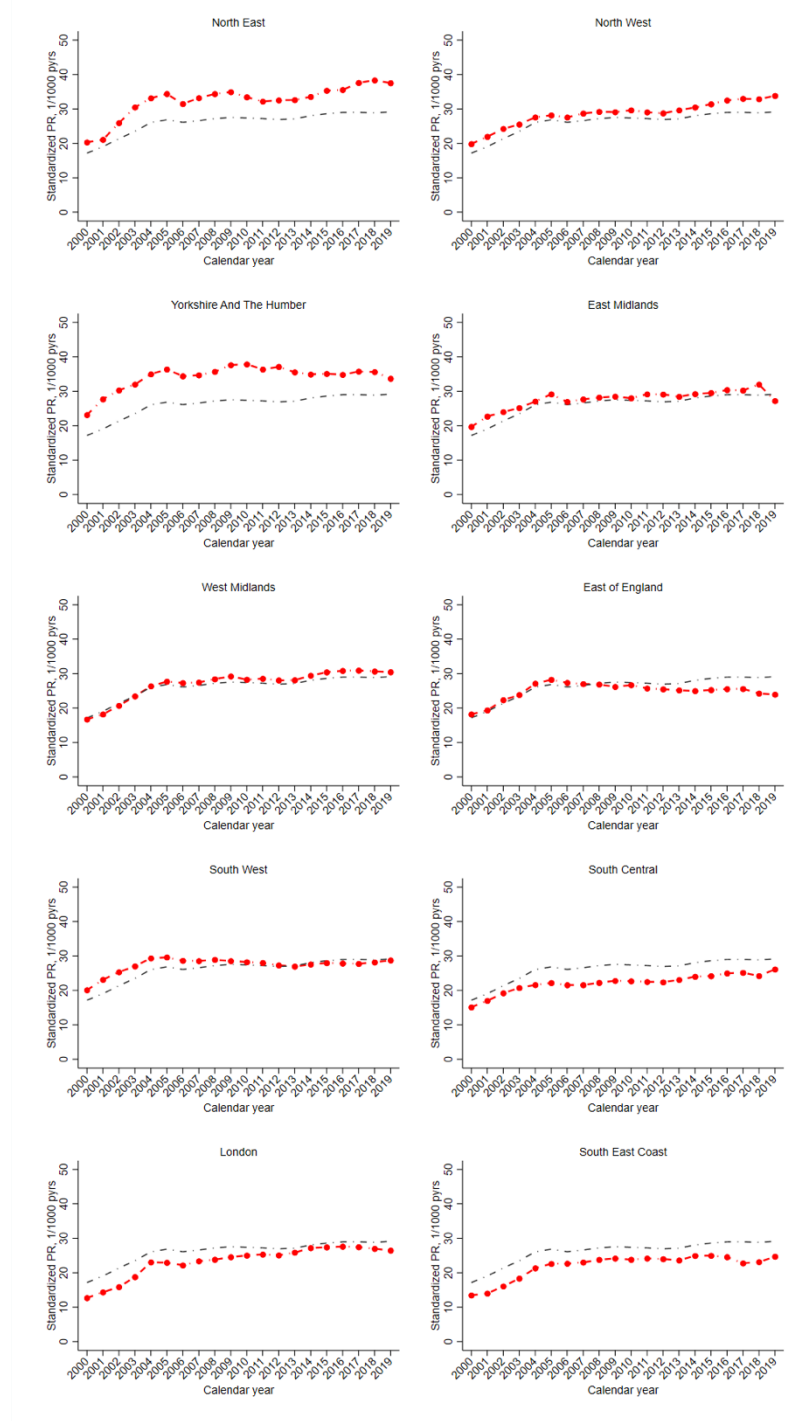

**Figure S11. Annual consultation prevalence of low back pain, by sex (without requirement for 3-year prior registration history): England, 2000-2019**

Data source = CPRD Aurum

Black dot, red square and blue diamond indicates age-standardised primary care consultation prevalence (per 1,000 person-years) for all, women and men, respectively.

Standard population = mid-2019 English population aged 15+ years (ONS code: E92000001)

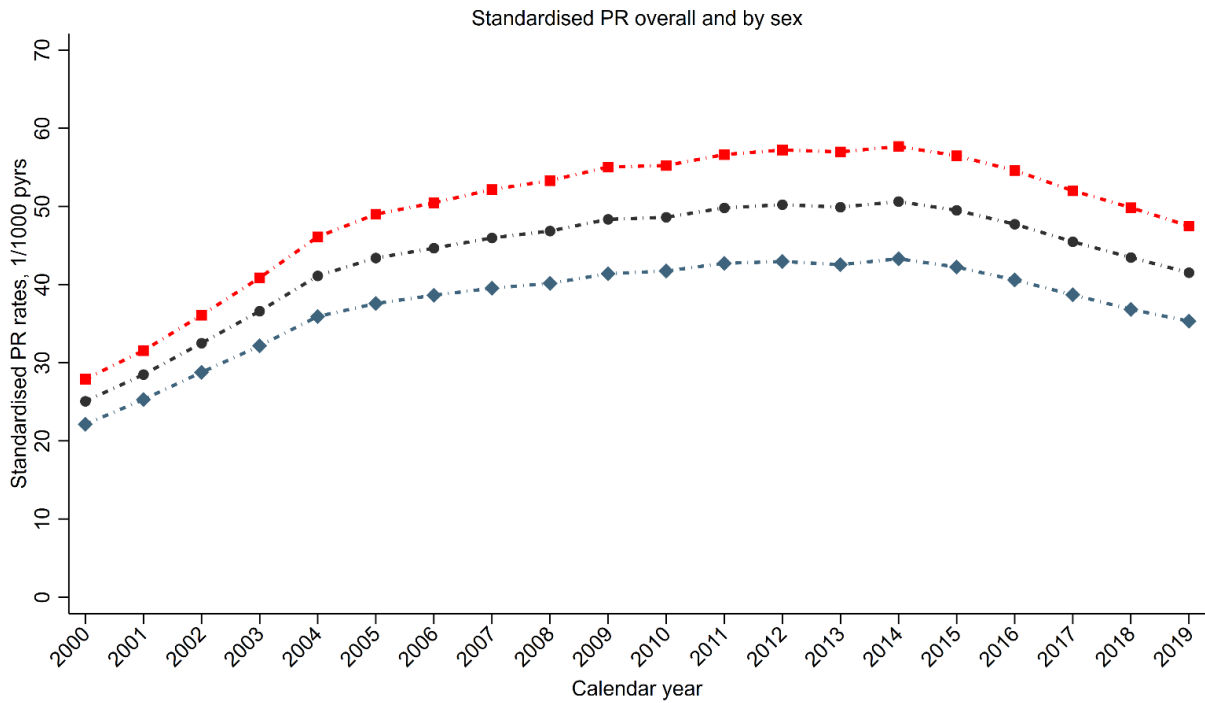

## Figure S12. Age-stratified annual consultation prevalence of low back pain, by sex (without requirement for 3-year prior registration history): England, 2000-2019

Data source = CPRD Aurum

Black dot, red square and blue diamond indicates age-standardised prevalence (per 1,000 person-years) for all, women and men, respectively.

Standard population = mid-2019 English population aged 15+ years (ONS code: E92000001)

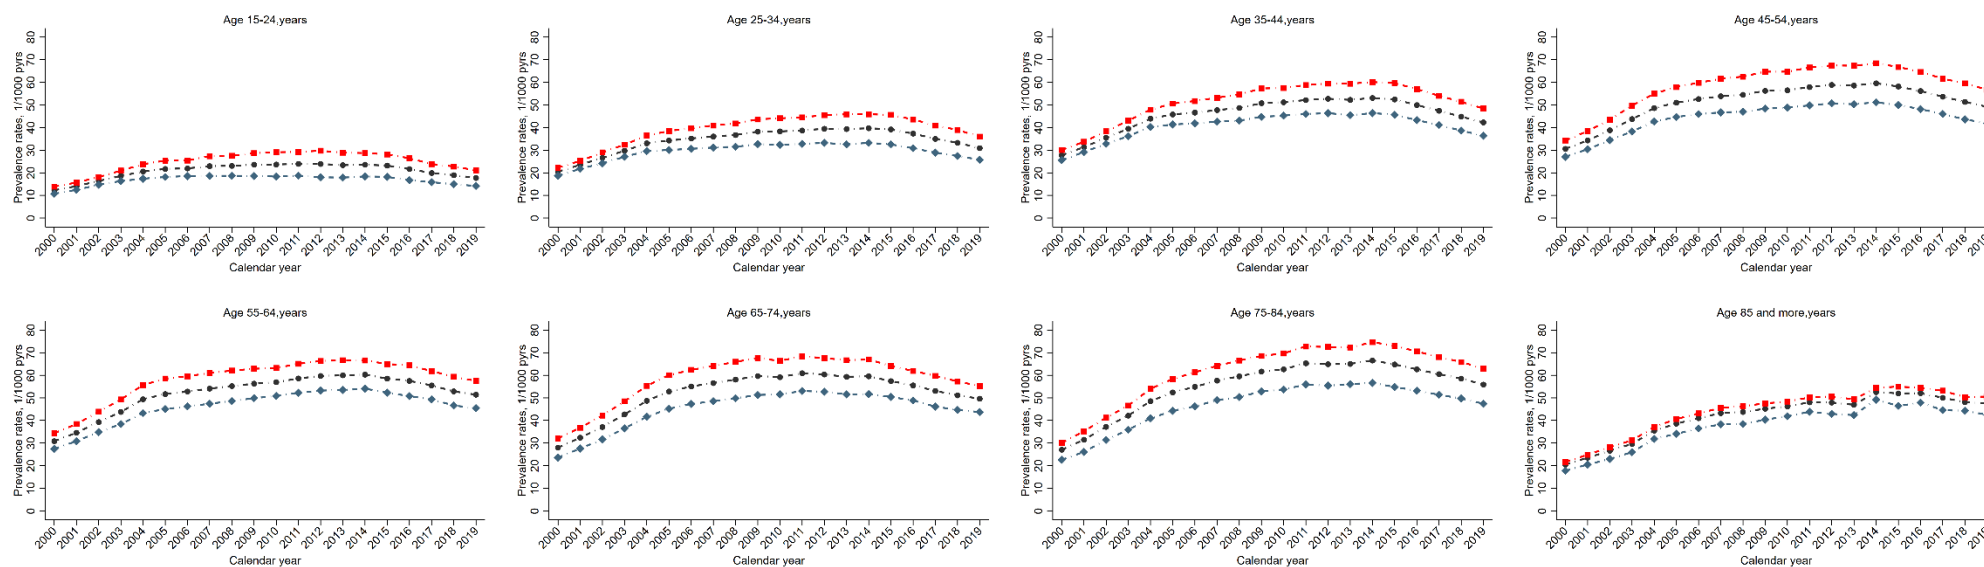



### Figure S13. Annual consultation prevalence of low back pain, by region (without requirement for 3-year prior registration history): England, 2000-2019

Data source = CPRD Aurum

Red dot line indicates the age-sex standardised primary care consultation prevalence (per 1,000 person-years) in the region. The grey line indicated the overall age-sex standardised primary care consultation prevalence in England.

Standard population = mid-2019 English population aged 15+ years (ONS code: E92000001)

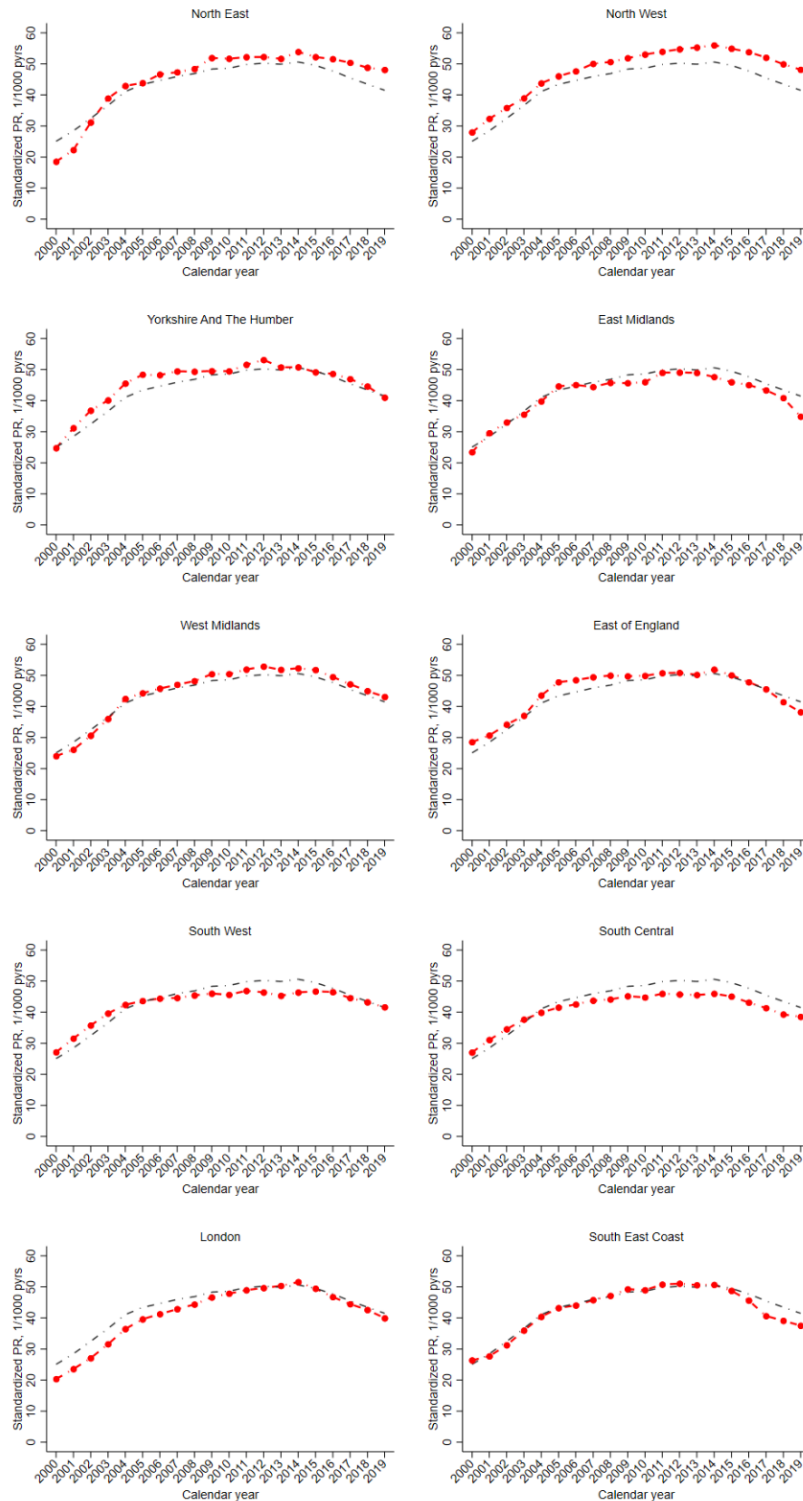

**Figure S14. Annual consultation prevalence of osteoarthritis, by sex (without requirement for 3-year prior registration history): England, 2000-2019**

Data source = CPRD Aurum

Black dot, red square and blue diamond indicates age-standardised primary care consultation prevalence (per 1,000 person-years) for all, women and men, respectively.

Standard population = mid-2019 English population aged 45+ years (ONS code: E92000001)

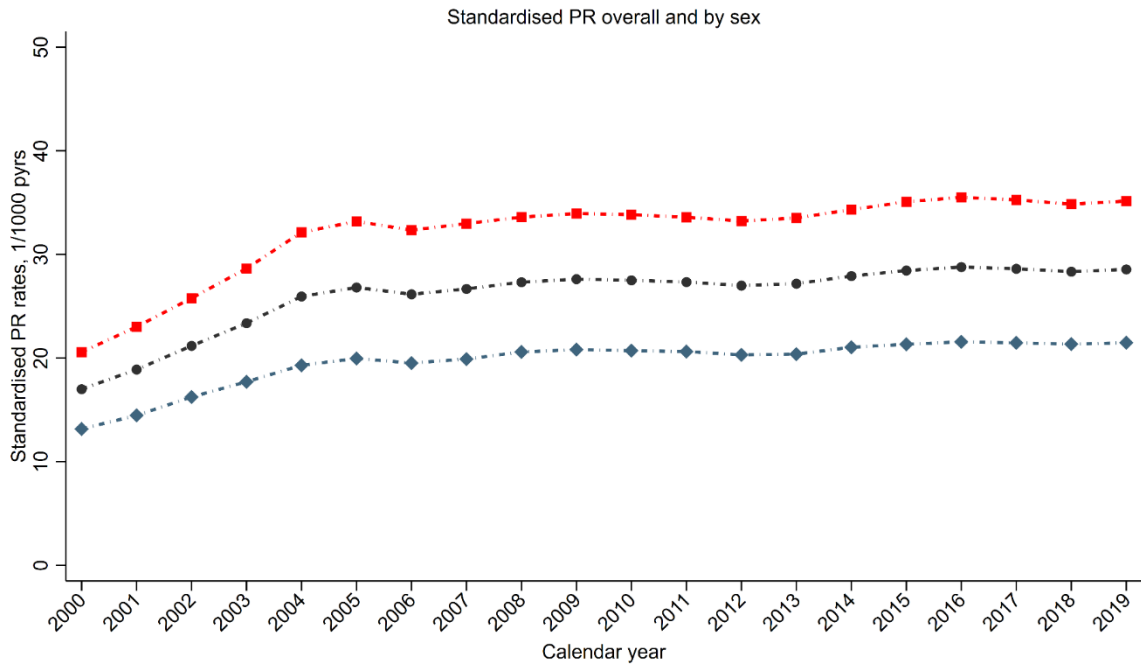

## Figure S15. Age-stratified annual consultation prevalence of osteoarthritis, by sex (without requirement for 3-year prior registration history): England, 2000-2019

Data source = CPRD Aurum

Black dot, red square and blue diamond indicates age-standardised prevalence (per 1,000 person-years) for all, women and men, respectively.

Standard population = mid-2019 English population aged 45+ years (ONS code: E92000001)

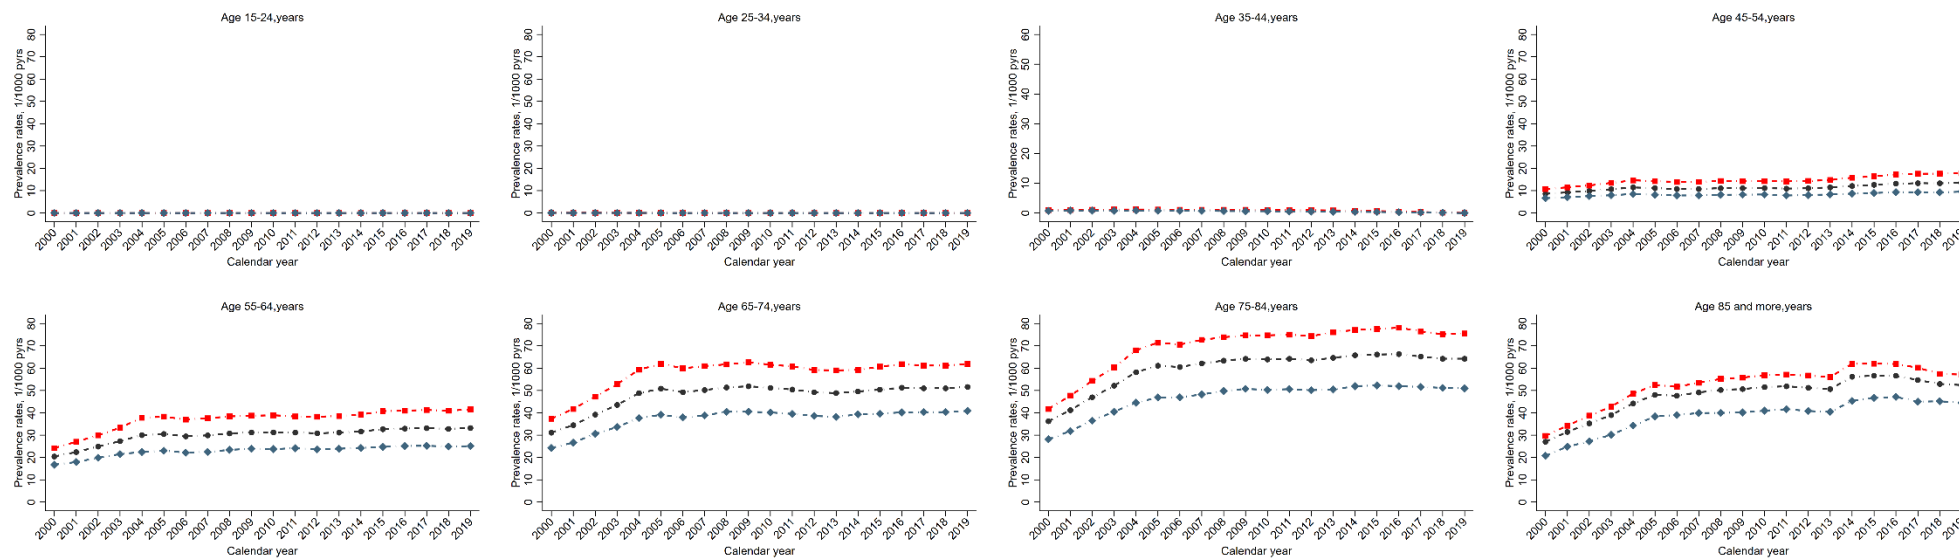

### Figure S16. Annual consultation prevalence of osteoarthritis, by region (without requirement for 3-year prior registration history): England, 2000-2019

Data source = CPRD Aurum

Red dot line indicates the age-sex standardised primary care consultation prevalence (per 1,000 person-years) in the region. The grey line indicated the overall age-sex standardised primary care consultation prevalence in England.

Standard population = mid-2019 English population aged 45+ years (ONS code: E92000001)

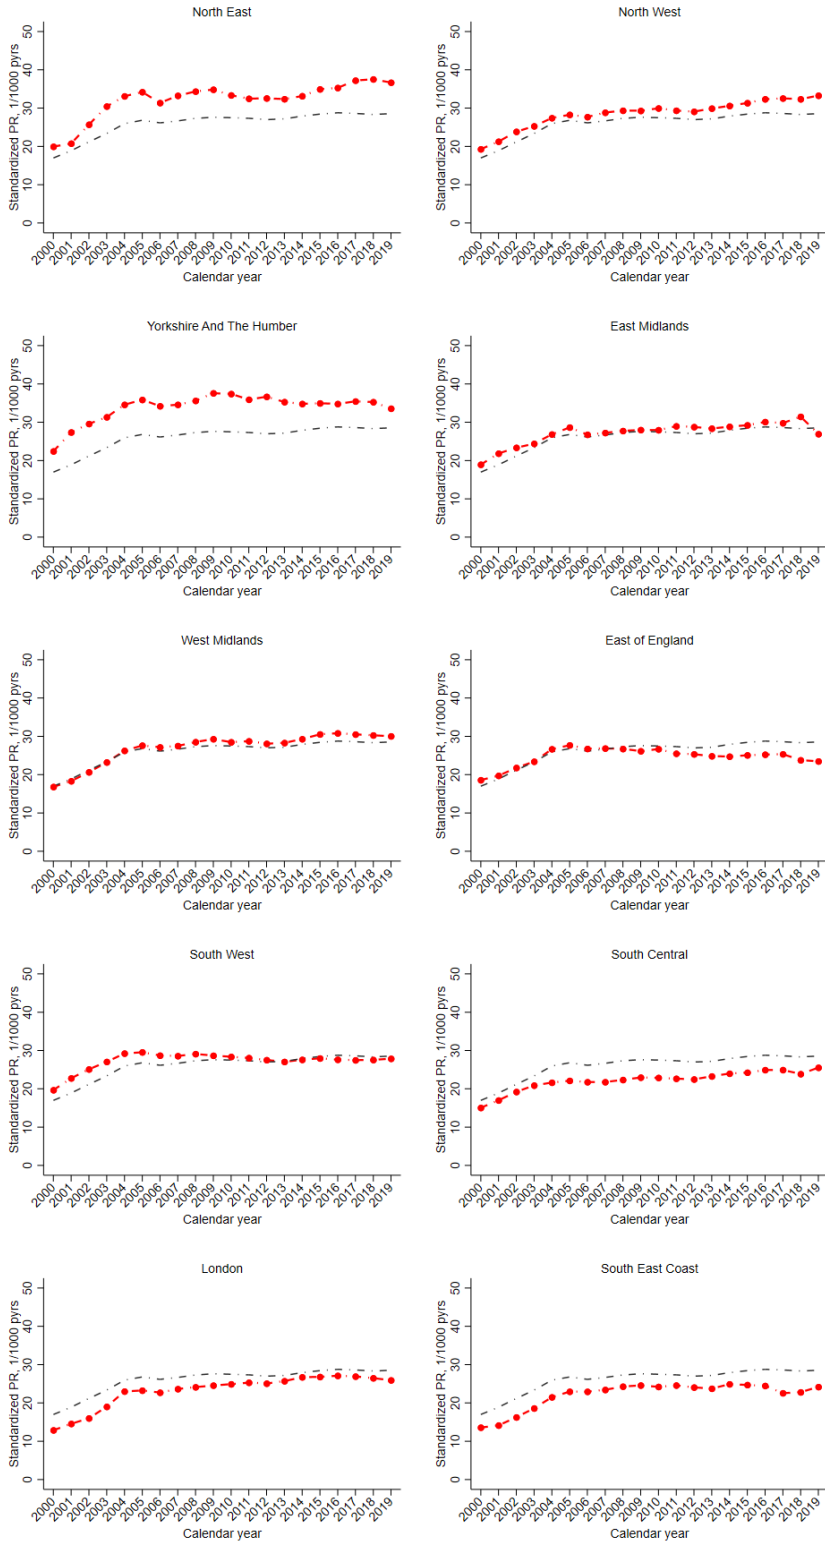

**Figure S17. Joinpoint regression models for standardised incidence and prevalence of low back pain and osteoarthritis in CPRD Aurum and GOLD**

**Low back pain – Incidence - Aurum**

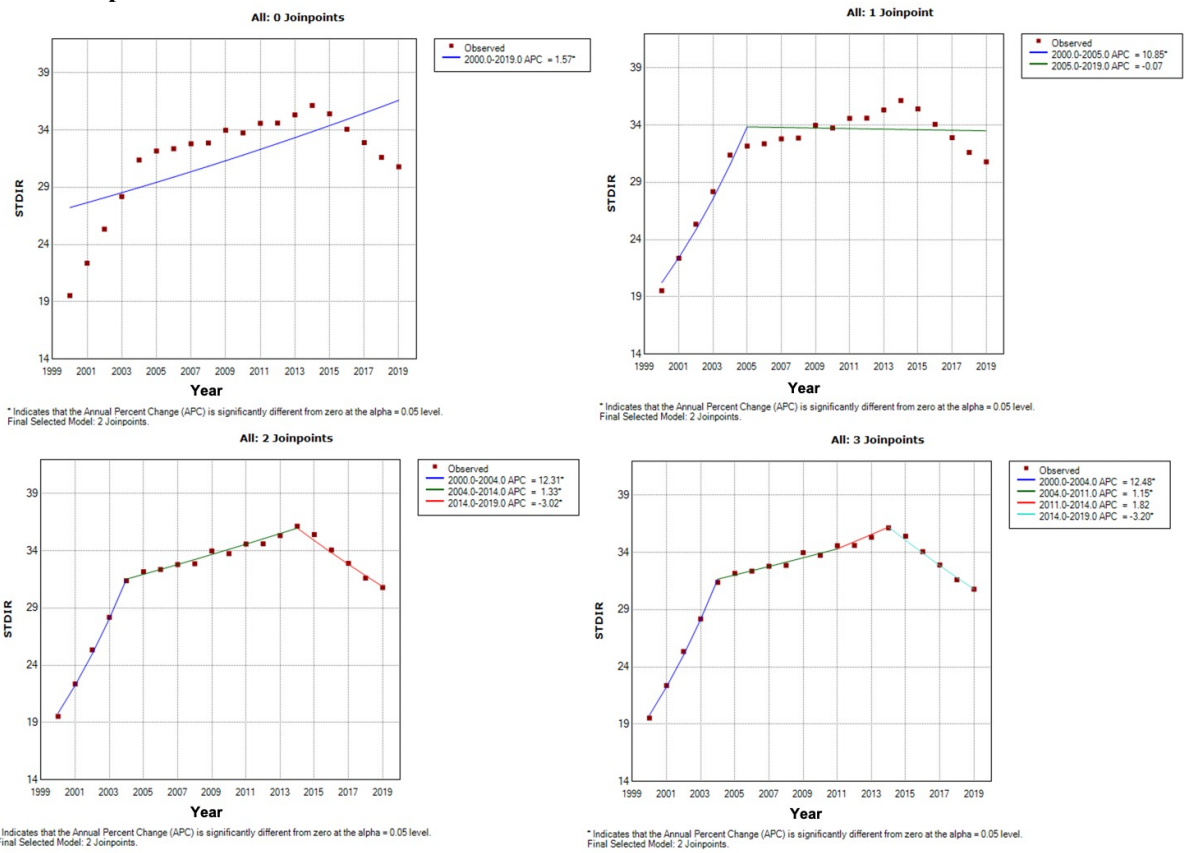

**Low back pain – Incidence - GOLD**

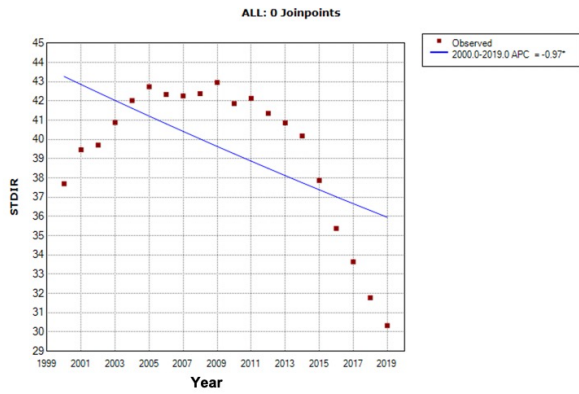

\* Indicates that the Annual Percent Change (APC) is significantly different from zero at the alpha = 0.05 level. Final Selected Model: 3 Joinpoints.

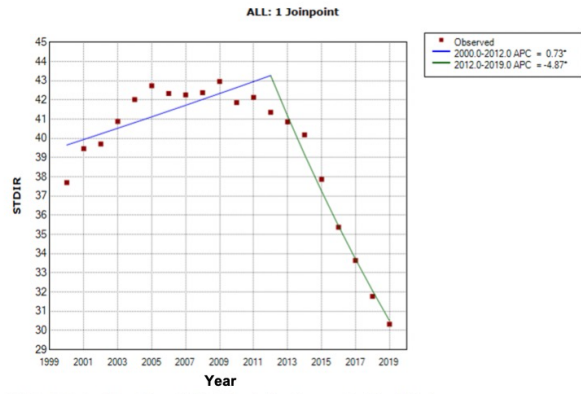

\* Indicates that the Annual Percent Change (APC) is significantly different from zero at the alpha = 0.05 level. Final Selected Model: 3 Joinpoints.

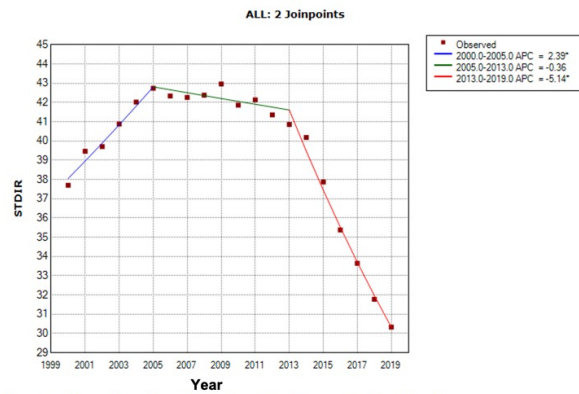

\* Indicates that the Annual Percent Change (APC) is significantly different from zero at the alpha = 0.05 level. Final Selected Model: 3 Joinpoints.

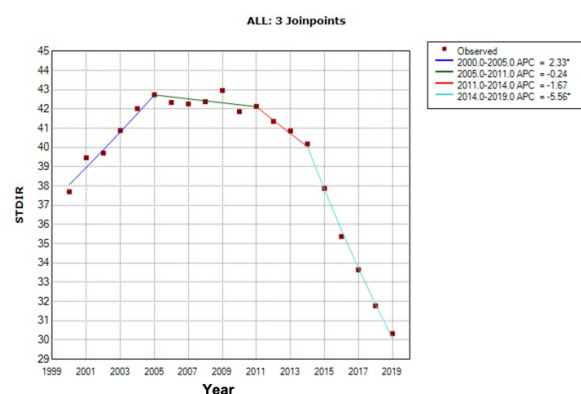

\* Indicates that the Annual Percent Change (APC) is significantly different from zero at the alpha = 0.05 level. Final Selected Model: 3 Joinpoints.

### Low back pain – Prevalence - Aurum

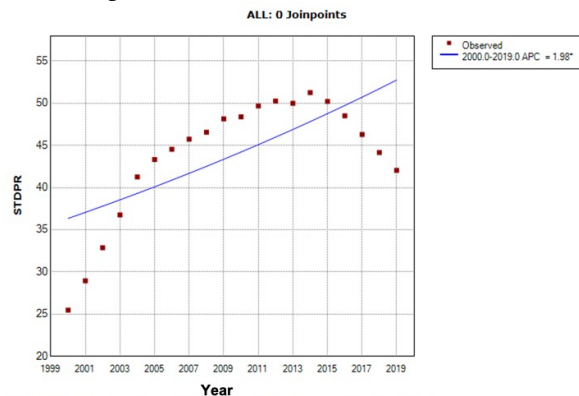

\* Indicates that the Annual Percent Change (APC) is significantly different from zero at the alpha = 0.05 level. Final Selected Model: 3 Joinpoints.

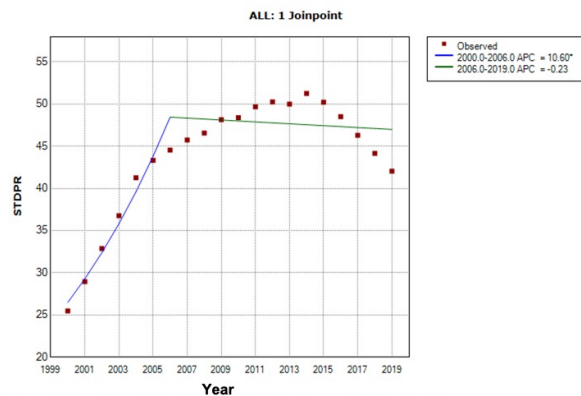

\* Indicates that the Annual Percent Change (APC) is significantly different from zero at the alpha = 0.05 level. Final Selected Model: 3 Joinpoints.

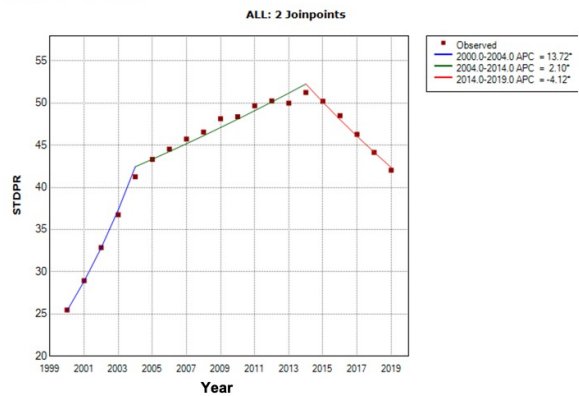

\* Indicates that the Annual Percent Change (APC) is significantly different from zero at the alpha = 0.05 level. Final Selected Model: 3 Joinpoints.

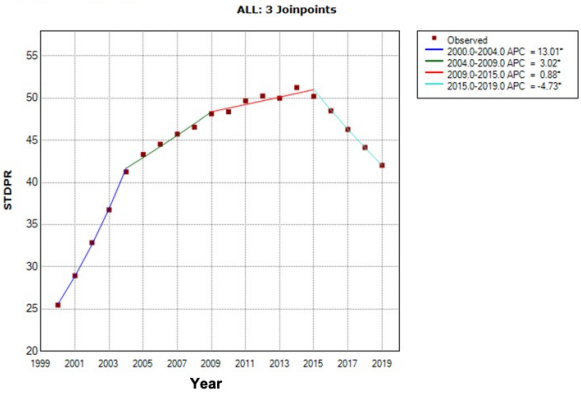

\* Indicates that the Annual Percent Change (APC) is significantly different from zero at the alpha = 0.05 level. Final Selected Model: 3 Joinpoints.

### Low back pain – Prevalence - GOLD

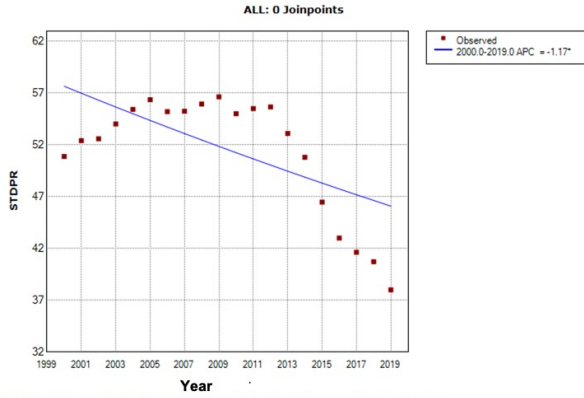

\* Indicates that the Annual Percent Change (APC) is significantly different from zero at the alpha = 0.05 level. Final Selected Model: 2 Joinpoints.

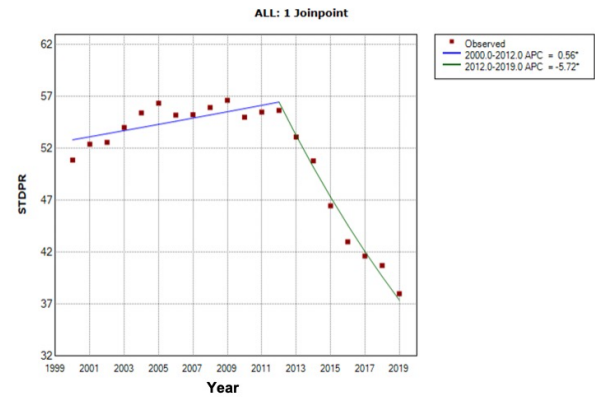

\* Indicates that the Annual Percent Change (APC) is significantly different from zero at the alpha = 0.05 level. Final Selected Model: 2 Joinpoints.

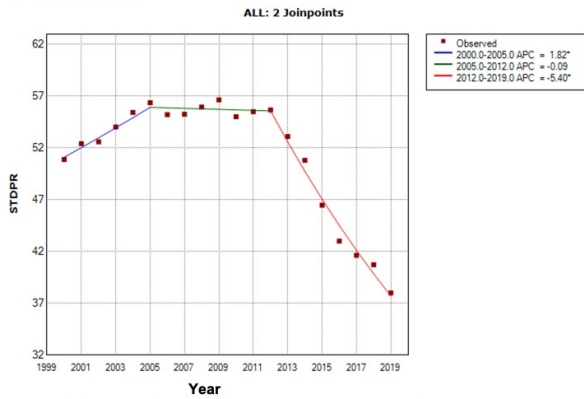

\* Indicates that the Annual Percent Change (APC) is significantly different from zero at the alpha = 0.05 level. Final Selected Model: 2 Joinpoints.

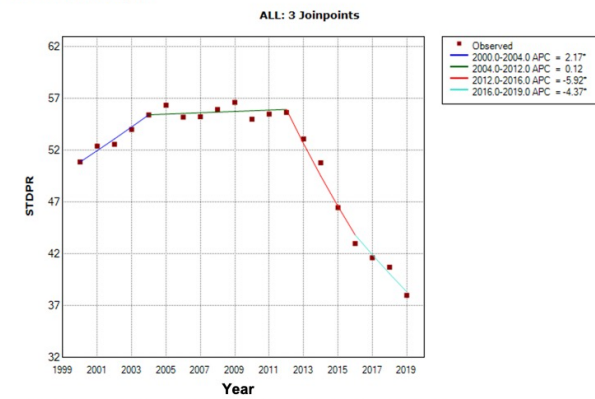

\* Indicates that the Annual Percent Change (APC) is significantly different from zero at the alpha = 0.05 level. Final Selected Model: 2 Joinpoints.

### Osteoarthritis – Incidence - Aurum

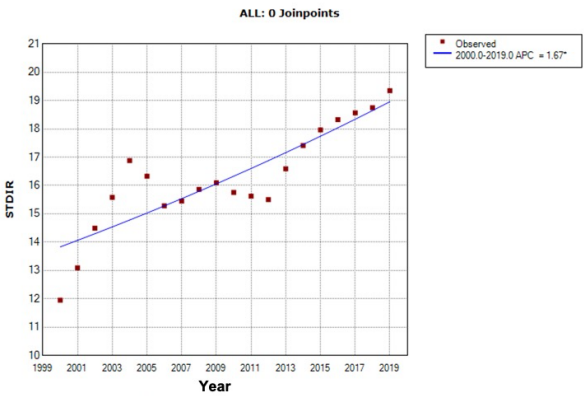

\* Indicates that the Annual Percent Change (APC) is significantly different from zero at the alpha = 0.05 level. Final Selected Model: 2 Joinpoints.

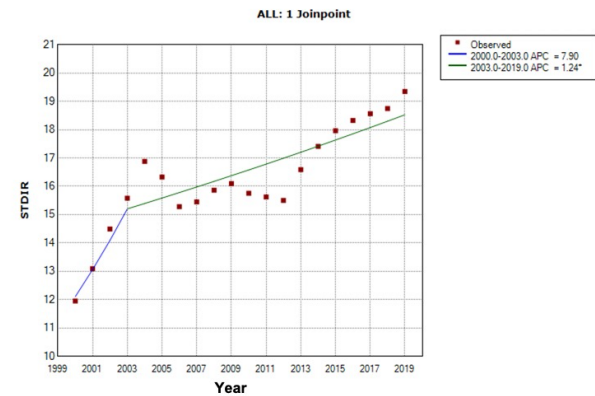

\* Indicates that the Annual Percent Change (APC) is significantly different from zero at the alpha = 0.05 level. Final Selected Model: 2 Joinpoints.

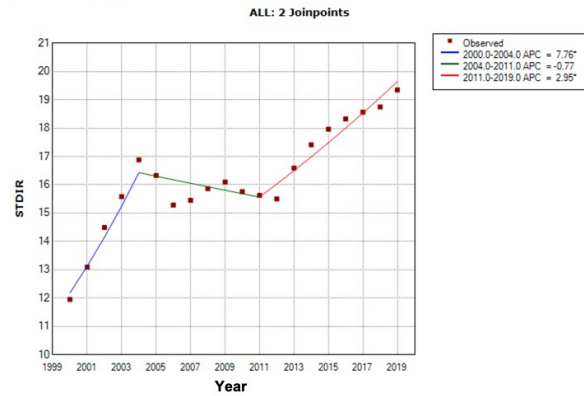

\* Indicates that the Annual Percent Change (APC) is significantly different from zero at the alpha = 0.05 level. Final Selected Model: 2 Joinpoints.

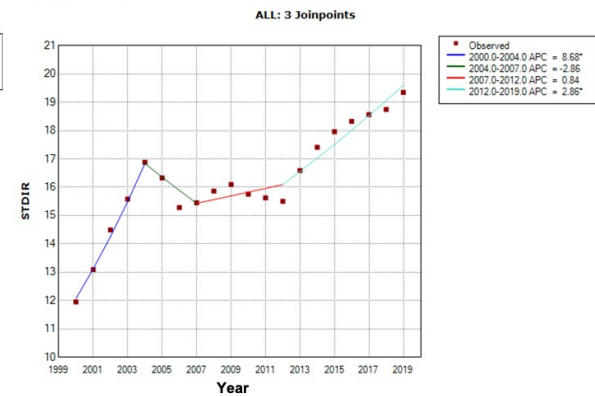

\* Indicates that the Annual Percent Change (APC) is significantly different from zero at the alpha = 0.05 level. Final Selected Model: 2 Joinpoints.

## Osteoarthritis – Incidence - GOLD

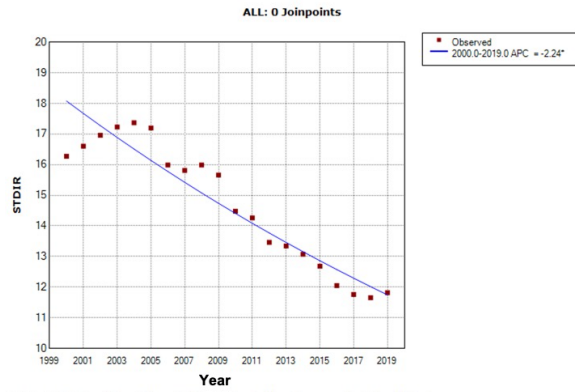

\* Indicates that the Annual Percent Change (APC) is significantly different from zero at the alpha = 0.05 level.  
Final Selected Model: 1 Joinpoint.

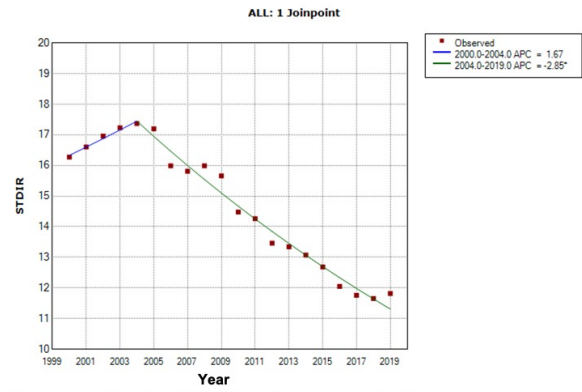

\* Indicates that the Annual Percent Change (APC) is significantly different from zero at the alpha = 0.05 level.  
Final Selected Model: 1 Joinpoint.

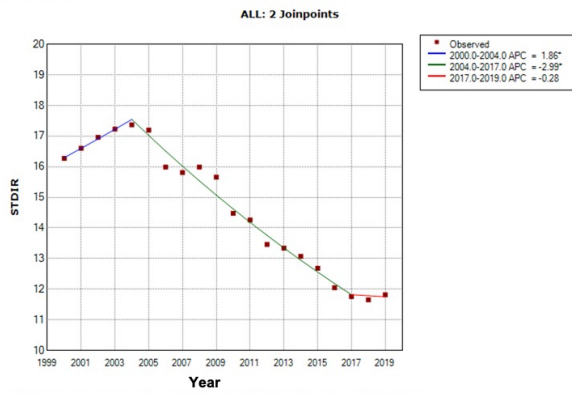

\* Indicates that the Annual Percent Change (APC) is significantly different from zero at the alpha = 0.05 level.  
Final Selected Model: 1 Joinpoint.

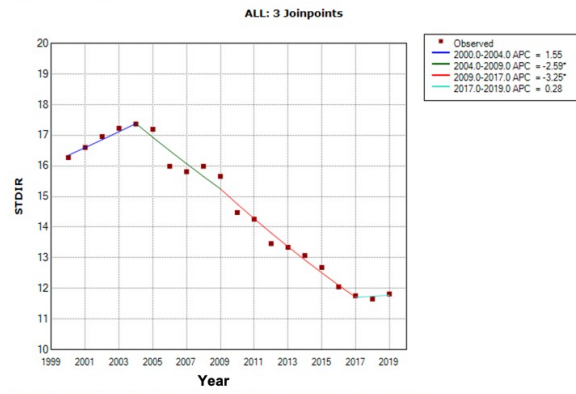

\* Indicates that the Annual Percent Change (APC) is significantly different from zero at the alpha = 0.05 level.  
Final Selected Model: 1 Joinpoint.

## Osteoarthritis – Prevalence - Aurum



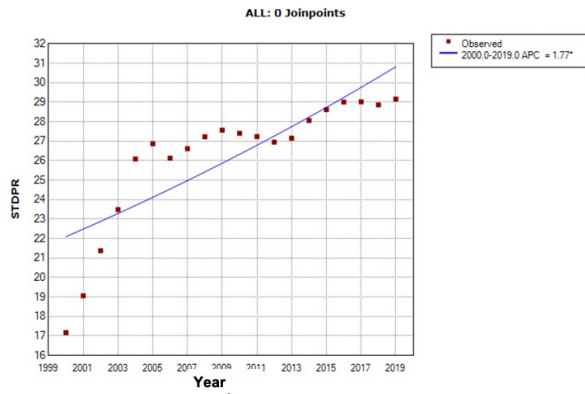

\* Indicates that the Annual Percent Change (APC) is significantly different from zero at the alpha = 0.05 level.  
Final Selected Model: 1 Joinpoint.

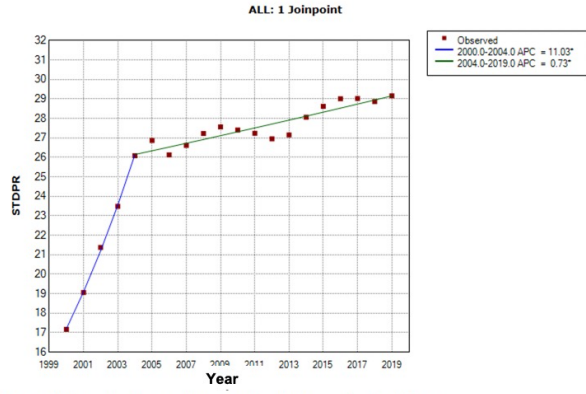

\* Indicates that the Annual Percent Change (APC) is significantly different from zero at the alpha = 0.05 level.

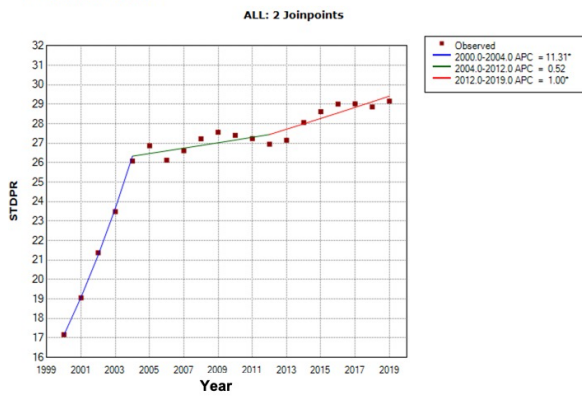

\* Indicates that the Annual Percent Change (APC) is significantly different from zero at the alpha = 0.05 level.  
Final Selected Model: 1 Joinpoint.

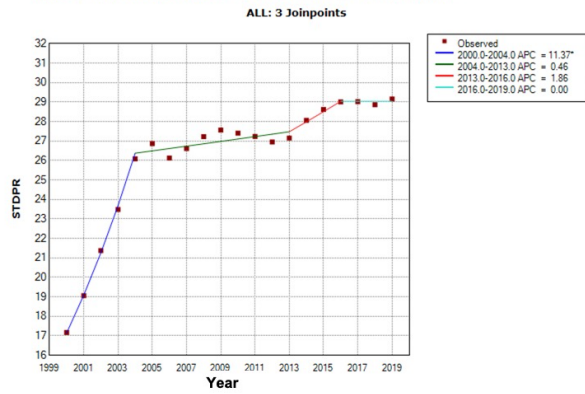

\* Indicates that the Annual Percent Change (APC) is significantly different from zero at the alpha = 0.05 level.  
Final Selected Model: 1 Joinpoint.

## Osteoarthritis – Prevalence - GOLD

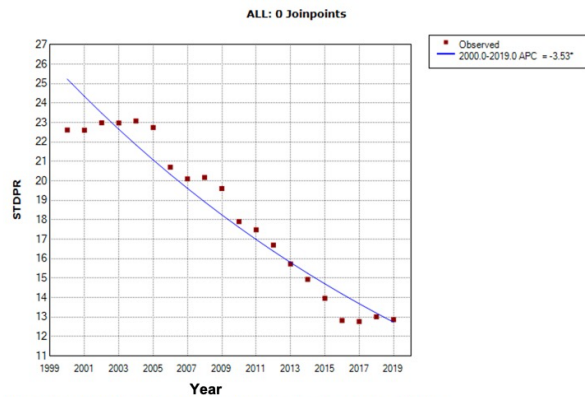

\* Indicates that the Annual Percent Change (APC) is significantly different from zero at the alpha = 0.05 level.  
Final Selected Model: 3 Joinpoints.

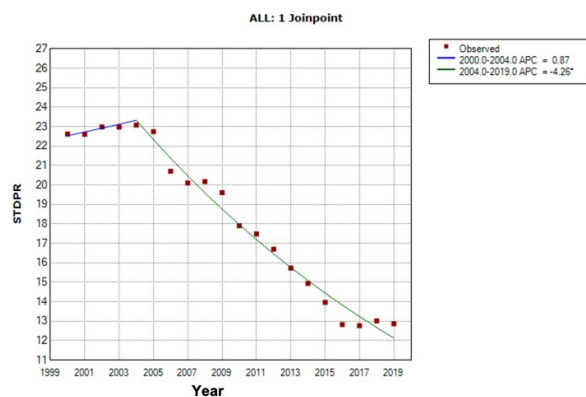

\* Indicates that the Annual Percent Change (APC) is significantly different from zero at the alpha = 0.05 level.  
Final Selected Model: 3 Joinpoints.

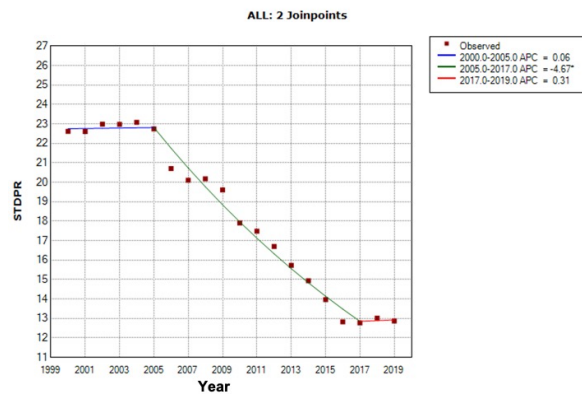

\* Indicates that the Annual Percent Change (APC) is significantly different from zero at the alpha = 0.05 level.  
Final Selected Model: 3 Joinpoints.

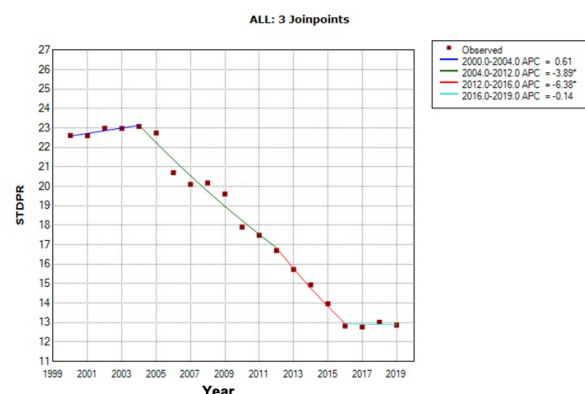

\* Indicates that the Annual Percent Change (APC) is significantly different from zero at the alpha = 0.05 level.  
Final Selected Model: 3 Joinpoints.
